# Supplementary material for: Heterogeneous Suzuki–Miyaura coupling of heteroaryl ester via chemoselective C(acyl)–O bond activation
Source: Royal Society of Chemistry journal article supplement (doi:10.1039/c9ra02394a), 2019-01-01

## Supporting Information

# Heterogeneous Suzuki–Miyaura Coupling of Heteroaryl Ester via Chemoselective C(acyl)–O Bond Activation

*Hongpeng Ma, Chaolumen Bai and Yong-Sheng Bao\**

*College of Chemistry and Environmental Science, Inner Mongolia Key Laboratory of  
Green Catalysis, Inner Mongolia Normal University, Hohhot, Inner Mongolia 010022,  
China*

\*(Y.B.) E-mail: sbbys197812@163.com.

### Contents

|                                                                            |     |
|----------------------------------------------------------------------------|-----|
| <b>1. Hg(0) poisoning test</b>                                             | S2  |
| <b>2. GC-MS Analysis of Model Reaction</b>                                 | S2  |
| <b>3. Characterization Data of the Products</b>                            | S4  |
| <b>4. <sup>1</sup>H NMR and <sup>13</sup>C NMR Spectra of the Products</b> | S10 |

## 1. Hg(0) poisoning test

Two model reactions solution were added into over-dried reaction tube under identical reaction conditions. Following reaction for 1 h at 120 °C the yields of both reactions were then determined by GC. Elemental mercury (60 mg) was introduced to one reaction tube at 120 °C. Both reaction mixtures were continued with stirring at 120 °C for 4 h. Subsequent analysis of the reaction yields suggests that reaction is inhibited by the introduction of Hg (0). The GC data as follows:

**Table S1. The results of Hg (0) poisoning test**

| Time (hour) | Yield (%) | Yield (Hg(0) poisoned after 1h) (%) |
|-------------|-----------|-------------------------------------|
| 0           | 0         | 0                                   |
| 1           | 26.13     | 26.17                               |
| 5           | 54.56     | 28.09                               |

## 2. GC-MS Analysis of Model Reaction

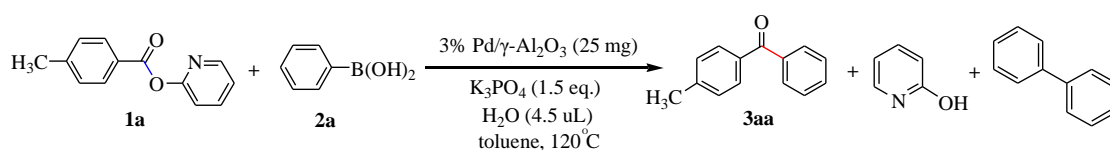

RT: 3.00 - 11.00

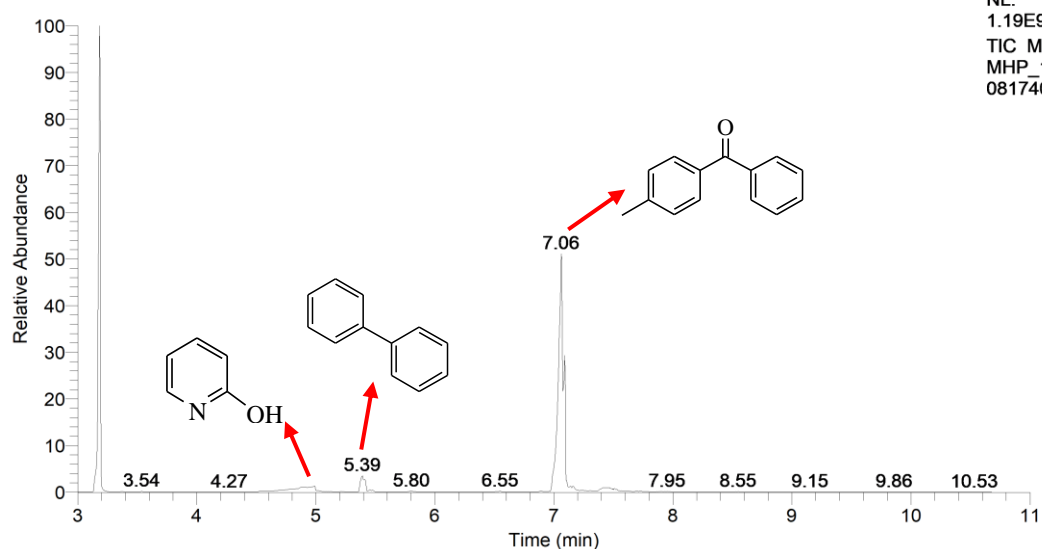

NL:  
1.19E9  
TIC MS  
MHP\_1901  
08174045

MHP\_190108174045 #1486 RT: 4.98 AV: 1 RF: 6.00, 3 NL: 4.26E6  
F: + c Full ms [50.00-650.00]

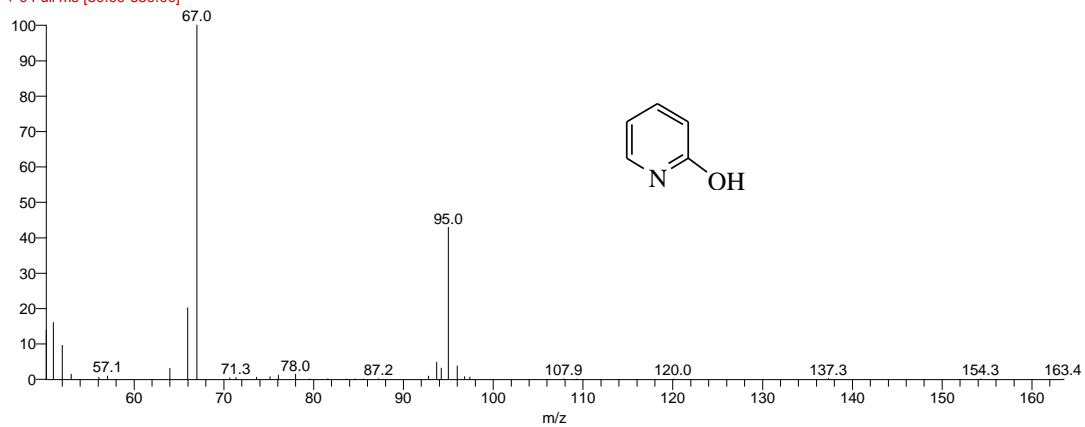

MHP\_190108174045 #1611 RT: 5.39 AV: 1 RF: 6.00, 3 NL: 4.42E6  
F: + c Full ms [50.00-650.00]

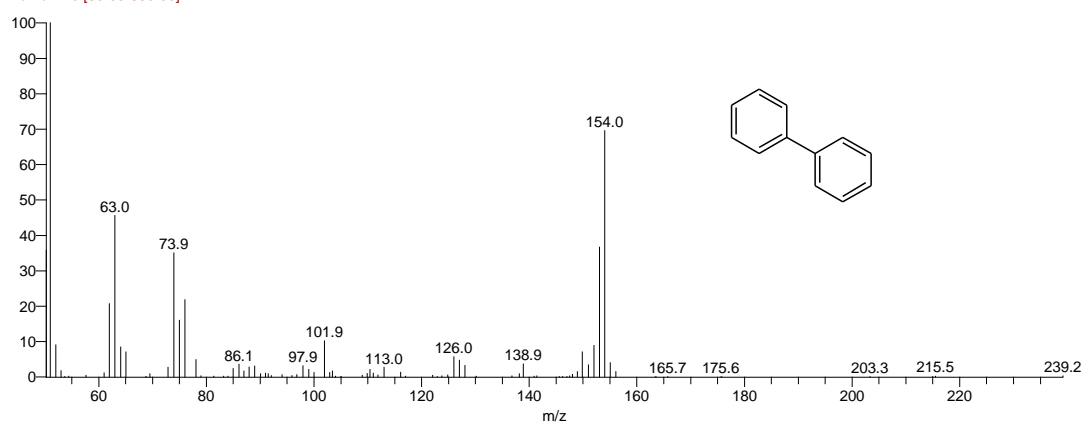

MHP\_190108174045 #2117 RT: 7.06 AV: 1 RF: 6.00, 3 NL: 1.21E8  
F: + c Full ms [50.00-650.00]

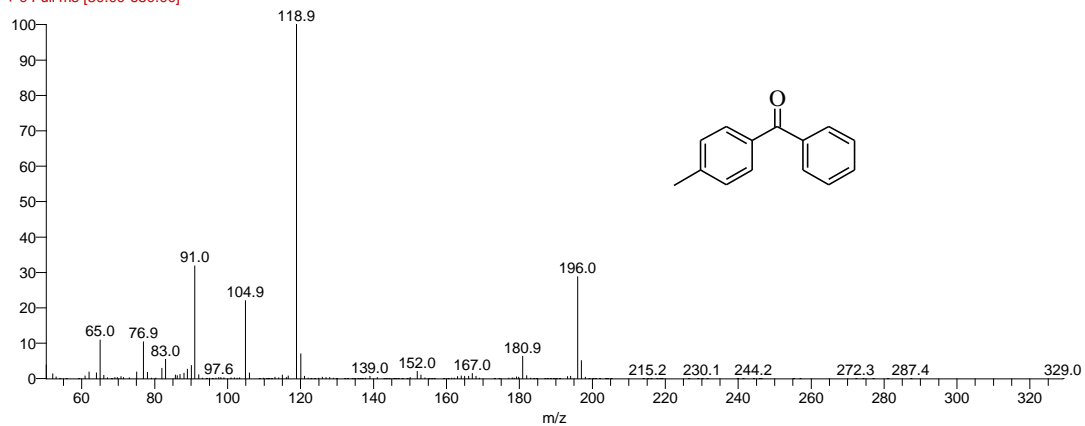

### 3. Characterization Data of the Products

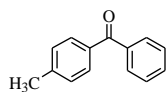

phenyl(*p*-tolyl)methanone **3aa**.<sup>1</sup> Yield: 88% (17.2 mg); <sup>1</sup>H NMR (600 MHz, Chloroform-*d*) δ 7.80-7.76 (m, 2H), 7.74-7.70 (m, 2H), 7.59-7.55 (m, 1H), 7.49-7.45 (m, 2H), 7.28 (d, *J* = 7.9 Hz, 2H), 2.44 (s, 3H); <sup>13</sup>C NMR (151 MHz, CDCl<sub>3</sub>) δ 196.5, 143.3, 138.0, 134.9, 132.2, 130.3, 130.3, 129.9, 129.0, 128.2, 21.7.

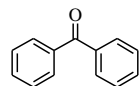

benzophenone **3ba**.<sup>2</sup> Yield: 78% (14.2 mg); <sup>1</sup>H NMR (600 MHz, Chloroform-*d*) δ 7.83-7.77 (m, 4H), 7.61-7.57 (m, 2H), 7.49 (t, *J* = 7.7 Hz, 4H); <sup>13</sup>C NMR (151 MHz, CDCl<sub>3</sub>) δ 196.8, 137.6, 132.4, 130.1, 128.3.

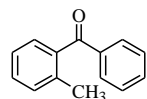

phenyl(*o*-tolyl)methanone **3ca**.<sup>3</sup> Yield: 51% (10.0 mg); <sup>1</sup>H NMR (600 MHz, Chloroform-*d*) δ 7.83-7.78 (m, 2H), 7.60-7.56 (m, 1H), 7.46 (t, *J* = 7.8 Hz, 2H), 7.41-7.37 (m, 1H), 7.33-7.27 (m, 2H), 7.26-7.22 (m, 1H), 2.33 (s, 3H); <sup>13</sup>C NMR (151 MHz, CDCl<sub>3</sub>) δ 198.7, 138.6, 137.8, 136.8, 133.1, 131.0, 130.3, 130.2, 128.5, 128.5, 125.2, 20.0.

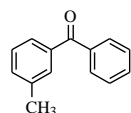

phenyl(*m*-tolyl)methanone **3da**.<sup>3</sup> Yield: 62% (12.2 mg); <sup>1</sup>H NMR (600 MHz, Chloroform-*d*) δ 7.82-7.77 (m, 2H), 7.63 (s, 1H), 7.61-7.55 (m, 2H), 7.48 (t, *J* = 7.7 Hz, 2H), 7.41-7.38 (m, 1H), 7.36 (t, *J* = 7.5 Hz, 1H), 2.42 (s, 3H); <sup>13</sup>C NMR (151 MHz, CDCl<sub>3</sub>) δ 197.0, 138.2, 137.8, 137.7, 133.2, 132.3, 130.5, 130.1, 128.3, 128.1, 127.4, 21.4.

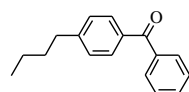

(4-butylphenyl)(phenyl)methanone **3ea**.<sup>4</sup> Yield: 68% (16.1 mg); <sup>1</sup>H NMR (600 MHz, Chloroform-*d*) δ 7.81-7.77 (m, 2H), 7.74 (d, *J* = 8.3 Hz, 2H), 7.60-7.55 (m, 1H), 7.47 (t, *J* = 7.7 Hz, 2H), 7.28 (d, *J* = 7.9 Hz, 2H), 2.69 (t, *J* = 7.8 Hz, 2H), 1.68-1.62 (m, 2H), 1.42-1.34 (m, 2H), 0.95 (t, *J* = 7.3 Hz, 3H); <sup>13</sup>C NMR (151 MHz, CDCl<sub>3</sub>) δ 196.6, 148.2, 138.0, 135.1, 132.2, 130.3, 130.0, 128.4, 128.2, 35.7, 33.3, 22.4, 13.9.

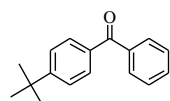

(4-*tert*-butylphenyl)(phenyl)methanone **3fa**.<sup>5</sup> Yield: 71% (16.8 mg); <sup>1</sup>H NMR (600 MHz, Chloroform-*d*) δ 7.82-7.79 (m, 2H), 7.78-7.74 (m, 2H), 7.58 (t, *J* = 7.4 Hz, 1H),

7.52-7.45 (m, 4H), 1.37 (s, 9H);  $^{13}\text{C}$  NMR (151 MHz,  $\text{CDCl}_3$ )  $\delta$  196.5, 156.2, 138.0, 134.8, 132.2, 130.1, 130.0, 128.2, 125.3, 35.1, 31.2.

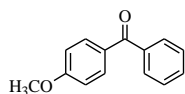

(4-methoxyphenyl)(phenyl)methanone **3ga**.<sup>3</sup> Yield: 66% (13.9 mg);  $^1\text{H}$  NMR (600 MHz, Chloroform-*d*)  $\delta$  7.83 (d,  $J = 8.7$  Hz, 2H), 7.76 (d,  $J = 7.3$  Hz, 2H), 7.56 (t,  $J = 7.4$  Hz, 1H), 7.47 (t,  $J = 7.7$  Hz, 2H), 6.97 (d,  $J = 8.7$  Hz, 2H), 3.89 (s, 3H);  $^{13}\text{C}$  NMR (151 MHz,  $\text{CDCl}_3$ )  $\delta$  195.6, 163.2, 138.3, 132.6, 131.9, 130.2, 129.7, 128.2, 113.6, 55.5.

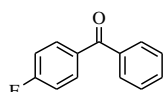

(4-fluorophenyl)(phenyl)methanone **3ha**.<sup>3</sup> Yield: 68% (13.6 mg);  $^1\text{H}$  NMR (600 MHz,  $\text{CDCl}_3$ )  $\delta$  7.88-7.82 (m, 2H), 7.77 (dd,  $J = 8.1, 1.1$  Hz, 2H), 7.62-7.58 (m, 1H), 7.49 (t,  $J = 7.7$  Hz, 2H), 7.19-7.14 (m, 2H);  $^{13}\text{C}$  NMR (151 MHz,  $\text{CDCl}_3$ )  $\delta$  195.29, 165.4 (d,  $J = 252.2$  Hz, 1C), 137.52, 133.8 (d,  $J = 1.8$  Hz, 1C), 132.7 (d,  $J = 9.2$  Hz, 1C), 132.48, 129.89, 128.37, 115.5 (d,  $J = 21.6$  Hz, 1C);  $^{19}\text{F}$  NMR (565 MHz,  $\text{CDCl}_3$ )  $\delta$  -190.27.

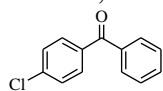

(4-chlorophenyl)(phenyl)methanone **3ia**.<sup>6</sup> Yield: 84% (18.2 mg);  $^1\text{H}$  NMR (600 MHz, Chloroform-*d*)  $\delta$  7.80-7.73 (m, 4H), 7.60 (t,  $J = 7.4$  Hz, 1H), 7.53-7.45 (m, 4H);  $^{13}\text{C}$  NMR (151 MHz,  $\text{CDCl}_3$ )  $\delta$  195.5, 138.9, 137.3, 135.9, 132.7, 131.5, 129.9, 128.7, 128.4.

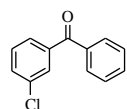

(3-chlorophenyl)(phenyl)methanone **3ja**.<sup>7</sup> Yield: 77% (16.6 mg);  $^1\text{H}$  NMR (600 MHz, Chloroform-*d*)  $\delta$  7.81-7.77 (m, 3H), 7.68-7.65 (m, 1H), 7.64-7.59 (m, 1H), 7.58-7.55 (m, 1H), 7.50 (t,  $J = 7.8$  Hz, 2H), 7.43 (t,  $J = 7.8$  Hz, 1H);  $^{13}\text{C}$  NMR (151 MHz,  $\text{CDCl}_3$ )  $\delta$  195.3, 139.3, 137.0, 134.6, 132.9, 132.4, 130.0, 129.9, 129.6, 128.5, 128.1.

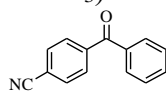

4-benzoylbenzotrile **3ka**.<sup>8</sup> Yield: 53% (11.0 mg);  $^1\text{H}$  NMR (600 MHz, Chloroform-*d*)  $\delta$  7.88 (d,  $J = 8.1$  Hz, 2H), 7.82-7.76 (m, 4H), 7.65 (t,  $J = 7.2$  Hz, 1H), 7.52 (t,  $J = 7.7$  Hz, 2H);  $^{13}\text{C}$  NMR (151 MHz,  $\text{CDCl}_3$ )  $\delta$  195.1, 141.3, 136.4, 133.3, 132.2, 130.3, 130.1, 128.7, 118.0, 115.7.

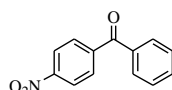

(4-nitrophenyl)(phenyl)methanone **3la**.<sup>3</sup> Yield: 76% (17.3 mg);  $^1\text{H}$  NMR (600 MHz, Chloroform-*d*)  $\delta$  8.35 (d,  $J = 8.7$  Hz, 2H), 7.94 (d,  $J = 8.7$  Hz, 2H), 7.85 – 7.76 (m, 2H), 7.66 (t,  $J = 7.5$  Hz, 1H), 7.53 (t,  $J = 7.8$  Hz, 2H);  $^{13}\text{C}$  NMR (151 MHz,  $\text{CDCl}_3$ )  $\delta$  194.8, 149.9, 142.9, 136.3, 133.5, 130.7, 130.1, 128.7, 123.6.

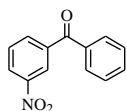

(3-nitrophenyl)(phenyl)methanone **3ma**.<sup>9</sup> Yield: 36% (8.1 mg); <sup>1</sup>H NMR (600 MHz, Chloroform-*d*) δ 8.63 (s, 1H), 8.47-8.42 (m, 1H), 8.15 (d, *J* = 7.6 Hz, 1H), 7.84-7.78 (m, 2H), 7.71 (t, *J* = 7.9 Hz, 1H), 7.66 (t, *J* = 7.4 Hz, 1H), 7.54 (t, *J* = 7.7 Hz, 2H); <sup>13</sup>C NMR (151 MHz, CDCl<sub>3</sub>) δ 194.2, 148.1, 139.1, 136.3, 135.5, 133.4, 130.0, 129.7, 128.8, 126.7, 124.8.

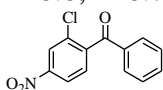

(2-chloro-4-nitrophenyl)(phenyl)methanone **3na**.<sup>10</sup> Yield: 25% (6.5 mg); <sup>1</sup>H NMR (600 MHz, Chloroform-*d*) δ 8.36 (d, *J* = 2.1 Hz, 1H), 8.25 (dd, *J* = 8.3, 2.1 Hz, 1H), 7.81-7.77 (m, 2H), 7.66 (t, *J* = 7.4 Hz, 1H), 7.57 (d, *J* = 8.3 Hz, 1H), 7.51 (t, *J* = 7.8 Hz, 2H); <sup>13</sup>C NMR (151 MHz, CDCl<sub>3</sub>) δ 193.3, 148.9, 144.5, 135.3, 134.6, 132.6, 130.0, 129.6, 129.0, 125.3, 121.9.

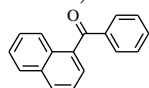

naphthalen-1-yl(phenyl)methanone **3oa**.<sup>9</sup> Yield: 48% (11.1 mg); <sup>1</sup>H NMR (600 MHz, Chloroform-*d*) δ 8.09 (d, *J* = 8.3 Hz, 1H), 8.01 (d, *J* = 8.2 Hz, 1H), 7.92 (d, *J* = 7.9 Hz, 1H), 7.87 (d, *J* = 7.3 Hz, 2H), 7.62-7.56 (m, 2H), 7.56-7.48 (m, 3H), 7.46 (t, *J* = 7.8 Hz, 2H); <sup>13</sup>C NMR (151 MHz, CDCl<sub>3</sub>) δ 198.0, 138.3, 136.4, 133.7, 133.2, 131.3, 131.0, 130.4, 128.5, 128.4, 127.8, 127.3, 126.5, 125.7, 124.4.

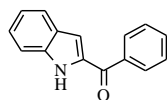

(1H-indol-2-yl)(phenyl)methanone **3pa**.<sup>11</sup> Yield: 100% (22.1 mg); <sup>1</sup>H NMR (600 MHz, CDCl<sub>3</sub>) δ 9.53 (s, 1H), 8.05-7.96 (m, 2H), 7.73 (d, *J* = 8.1 Hz, 1H), 7.66-7.60 (m, 1H), 7.55 (t, *J* = 7.7 Hz, 2H), 7.52-7.47 (m, 1H), 7.41-7.34 (m, 1H), 7.22-7.13 (m, 2H); <sup>13</sup>C NMR (151 MHz, CDCl<sub>3</sub>) δ 187.3, 138.0, 137.6, 134.4, 132.4, 129.3, 128.5, 127.8, 126.6, 123.3, 121.1, 112.9, 112.2.

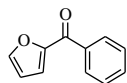

furan-2-yl(phenyl)methanone **3qa**.<sup>12</sup> Yield: 85% (14.7 mg); <sup>1</sup>H NMR (600 MHz, CDCl<sub>3</sub>) δ 7.98 (d, *J* = 7.6 Hz, 2H), 7.72 (s, 1H), 7.60 (t, *J* = 7.4 Hz, 1H), 7.50 (t, *J* = 7.7 Hz, 2H), 7.24 (d, *J* = 3.5 Hz, 1H), 6.60 (dd, *J* = 3.3, 1.4 Hz, 1H); <sup>13</sup>C NMR (151 MHz, CDCl<sub>3</sub>) δ 182.6, 152.3, 147.1, 137.3, 132.6, 129.3, 128.4, 120.6, 112.2.

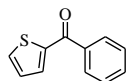

phenyl(thiophen-2-yl)methanone **3ra**.<sup>13</sup> Yield: 90% (16.9 mg); <sup>1</sup>H NMR (600 MHz, CDCl<sub>3</sub>) δ 7.87 (d, *J* = 7.5 Hz, 2H), 7.73 (d, *J* = 4.9 Hz, 1H), 7.65 (d, *J* = 3.7 Hz, 1H), 7.59 (t, *J* = 7.4 Hz, 1H), 7.50 (t, *J* = 7.7 Hz, 2H), 7.19-7.14 (m, 1H); <sup>13</sup>C NMR (151 MHz, CDCl<sub>3</sub>) δ 188.3, 143.7, 138.2, 134.9, 134.2, 132.3, 129.2, 128.4, 128.0.

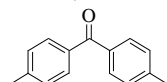

*di-p*-tolyl-methanone **3ab**.<sup>44</sup> Yield: 62% (13.0 mg); <sup>1</sup>H NMR (600 MHz, CDCl<sub>3</sub>) δ 7.70 (d, *J* = 8.1 Hz, 2H), 7.27 (d, *J* = 7.9 Hz, 2H), 2.44 (s, 3H); <sup>13</sup>C NMR (151 MHz, CDCl<sub>3</sub>) δ 196.3, 142.9, 135.2, 130.2, 128.9, 21.64.

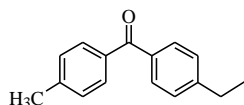

(4-ethylphenyl)(*p*-tolyl)methanone **3ac**.<sup>14</sup> Yield: 51% (11.4 mg); <sup>1</sup>H NMR (600 MHz, CDCl<sub>3</sub>) δ 7.72 (dd, *J* = 9.9, 8.2 Hz, 4H), 7.29 (dd, *J* = 13.1, 8.0 Hz, 4H), 2.73 (q, *J* = 7.6 Hz, 2H), 2.44 (s, 3H), 1.28 (t, *J* = 7.6 Hz, 3H); <sup>13</sup>C NMR (151 MHz, CDCl<sub>3</sub>) δ 196.3, 149.1, 142.9, 135.5, 135.2, 130.3, 130.2, 128.9, 127.7, 29.0, 21.6, 15.3.

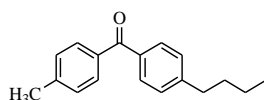

(4-butylphenyl)(*p*-tolyl)methanone **3ad**.<sup>15</sup> Yield: 58% (14.6 mg); <sup>1</sup>H NMR (600 MHz, CDCl<sub>3</sub>) δ 7.82-7.62 (m, 4H), 7.30-7.26 (m, 4H), 2.69 (t, *J* = 7.8 Hz, 2H), 2.44 (s, 3H), 1.70-1.60 (m, 2H), 1.43-1.34 (m, 2H), 0.95 (t, *J* = 7.4 Hz, 3H); <sup>13</sup>C NMR (151 MHz, CDCl<sub>3</sub>) δ 196.3, 147.9, 142.9, 135.4, 135.3, 130.2, 128.9, 128.3, 35.7, 33.3, 22.4, 21.7, 13.9.

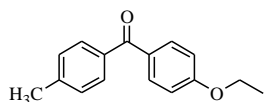

(4-ethoxyphenyl)(*p*-tolyl)methanone **3ae**.<sup>16</sup> Yield: 62% (14.9 mg); <sup>1</sup>H NMR (600 MHz, CDCl<sub>3</sub>) δ 7.80 (d, *J* = 8.7 Hz, 2H), 7.68 (d, *J* = 8.0 Hz, 2H), 7.27 (d, *J* = 8.0 Hz, 1H), 6.94 (d, *J* = 8.7 Hz, 2H), 4.12 (q, *J* = 7.0 Hz, 2H), 2.44 (s, 3H), 1.46 (t, *J* = 7.0 Hz, 3H); <sup>13</sup>C NMR (151 MHz, CDCl<sub>3</sub>) δ 195.4, 162.5, 142.6, 135.6, 132.5, 130.3, 130.0, 128.9, 113.9, 63.8, 21.6, 14.7.

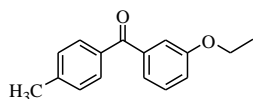

(3-ethoxyphenyl)(*p*-tolyl)methanone **3af**.<sup>17</sup> Yield: 79% (18.9 mg); <sup>1</sup>H NMR (600 MHz, CDCl<sub>3</sub>) δ 7.72 (d, *J* = 8.1 Hz, 2H), 7.39-7.33 (m, 1H), 7.33-7.30 (m, 2H), 7.28 (d, *J* = 8.0 Hz, 2H), 7.16-7.07 (m, 1H), 4.08 (q, *J* = 7.0 Hz, 2H), 2.44 (s, 3H), 1.43 (t, *J* = 7.0 Hz, 3H); <sup>13</sup>C NMR (151 MHz, CDCl<sub>3</sub>) δ 196.3, 158.9, 143.2, 139.2, 134.9, 130.3, 129.2, 129.0, 122.5, 119.1, 115.0, 63.7, 21.7, 14.8.

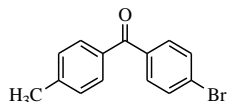

(4-bromophenyl)(*p*-tolyl)methanone **3ah**.<sup>3</sup> Yield: 67% (18.3 mg); <sup>1</sup>H NMR (600 MHz, CDCl<sub>3</sub>) δ 7.69 (d, *J* = 8.1 Hz, 2H), 7.68-7.64 (m, 2H), 7.64-7.60 (m, 2H), 7.29 (d, *J* = 8.0 Hz, 2H), 2.45 (s, 3H); <sup>13</sup>C NMR (151 MHz, CDCl<sub>3</sub>) δ 195.4, 143.6, 136.7, 134.5, 131.6, 131.5, 130.2, 129.1, 127.2, 21.68.

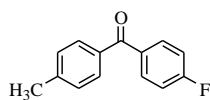

(4-fluorophenyl)(*p*-tolyl)methanone **3ai**.<sup>18</sup> Yield: 82% (17.6 mg); <sup>1</sup>H NMR (600 MHz, CDCl<sub>3</sub>) δ 7.82 (dd, *J* = 8.0, 5.7 Hz, 2H), 7.69 (d, *J* = 7.8 Hz, 2H), 7.29 (d, *J* = 7.8 Hz, 2H), 7.15 (t, *J* = 8.4 Hz, 2H), 2.44 (s, 3H); <sup>13</sup>C NMR (151 MHz, CDCl<sub>3</sub>) δ 195.1, 165.3 (d, *J* = 253.7 Hz, 1C), 143.3, 134.8, 134.2 (d, *J* = 3.0 Hz, 1C), 132.5 (d, *J* = 9.1 Hz, 2C), 130.2, 129.1, 115.4 (d, *J* = 21.9 Hz, 2C), 21.7; <sup>19</sup>F NMR (565 MHz, CDCl<sub>3</sub>) δ -190.26.

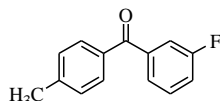

(3-fluorophenyl)(*p*-tolyl)methanone **3aj**.<sup>19</sup> Yield: 80% (17.2 mg); <sup>1</sup>H NMR (600 MHz, CDCl<sub>3</sub>) δ 7.72 (d, *J* = 8.1 Hz, 2H), 7.55 (d, *J* = 7.7 Hz, 1H), 7.50-7.42 (m, 2H), 7.32-7.27 (m, 3H), 2.45 (s, 3H); <sup>19</sup>F NMR (565 MHz, CDCl<sub>3</sub>) δ -190.26.

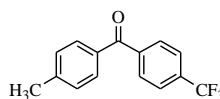

*p*-tolyl(4-(trifluoromethyl)phenyl)methanone **3ak**.<sup>20</sup> Yield: 70% (18.4 mg); <sup>1</sup>H NMR (600 MHz, CDCl<sub>3</sub>) δ 7.87 (d, *J* = 8.0 Hz, 2H), 7.74 (d, *J* = 8.1 Hz, 2H), 7.72 (d, *J* = 8.1 Hz, 2H), 7.30 (d, *J* = 7.9 Hz, 2H), 2.45 (s, 3H); <sup>13</sup>C NMR (151 MHz, CDCl<sub>3</sub>) δ 195.3, 144.1, 141.1, 134.1, 133.5 (q, *J* = 32.6 Hz, 1C), 130.4(2C), 130.0(2C), 129.2(2C), 125.3 (q, *J* = 3.7 Hz, 2C), 123.7 (q, *J* = 272.7 Hz, 1C), 21.7; <sup>19</sup>F NMR (565 MHz, CDCl<sub>3</sub>) δ -62.97.

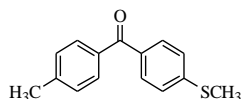

(4-(methylthio)phenyl)(*p*-tolyl)methanone **3al**.<sup>21</sup> Yield: 55% (13.3 mg); <sup>1</sup>H NMR (600 MHz, CDCl<sub>3</sub>) δ 7.73 (d, *J* = 8.4 Hz, 2H), 7.69 (d, *J* = 8.1 Hz, 2H), 7.31-7.26 (m, 4H), 2.54 (s, 3H), 2.44 (s, 3H); <sup>13</sup>C NMR (151 MHz, CDCl<sub>3</sub>) δ 195.6, 144.9, 143.0, 135.1, 134.1, 130.6, 130.1, 129.0, 124.86, 77.24, 77.03, 76.81, 21.65, 14.91.

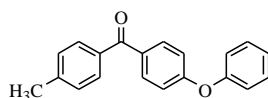

(4-phenoxyphenyl)(*p*-tolyl)methanone **3am**.<sup>22</sup> Yield: 48% (13.8 mg); <sup>1</sup>H NMR (600 MHz, CDCl<sub>3</sub>) δ 7.80 (d, *J* = 8.7 Hz, 2H), 7.70 (d, *J* = 8.0 Hz, 2H), 7.40 (t, *J* = 7.9 Hz, 2H), 7.28 (d, *J* = 7.9 Hz, 2H), 7.20 (t, *J* = 7.4 Hz, 1H), 7.10 (d, *J* = 7.9 Hz, 2H), 7.03 (d, *J* = 8.7 Hz, 2H), 2.44 (s, 3H); <sup>13</sup>C NMR (151 MHz, CDCl<sub>3</sub>) δ 195.3, 161.4, 155.7, 142.9, 135.2, 132.3, 132.3, 130.1, 130.0, 129.0, 124.5, 120.1, 117.2, 21.6.

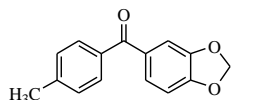

benzo[d][1,3]dioxol-5-yl(*p*-tolyl)methanone **3an**.<sup>23</sup> Yield: 45% (10.8 mg); <sup>1</sup>H NMR (600 MHz, CDCl<sub>3</sub>) δ 7.67 (d, *J* = 8.0 Hz, 2H), 7.39-7.32 (m, 2H), 7.29-7.26 (m, 2H), 6.86 (d, *J* = 8.0 Hz, 1H), 6.06 (s, 2H), 2.44 (s, 3H); <sup>13</sup>C NMR (151 MHz, CDCl<sub>3</sub>) δ 195.0, 151.3, 147.9, 142.8, 135.4, 132.3, 130.0, 128.9, 126.6, 110.0, 107.7, 101.8, 21.6.



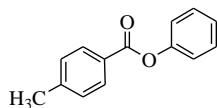

4-methylbenzoic acid phenyl ester **5aa**.<sup>24</sup> Yield: 48% (10.2 mg); <sup>1</sup>H NMR (600 MHz, CDCl<sub>3</sub>) δ 8.10 (d, *J* = 8.2 Hz, 2H), 7.45-7.40 (m, 2H), 7.31 (d, *J* = 8.0 Hz, 2H), 7.28-7.25 (m, 1H), 7.23-7.20 (m, 2H), 2.45 (s, 3H).

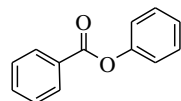

benzoic acid phenyl ester **5ga**.<sup>24</sup> Yield: 32% (6.3 mg); <sup>1</sup>H NMR (600 MHz, CDCl<sub>3</sub>) δ 8.21 (d, *J* = 7.4 Hz, 2H), 7.62 (t, *J* = 7.3 Hz, 1H), 7.50 (t, *J* = 7.6 Hz, 2H), 7.42 (t, *J* = 7.7 Hz, 2H), 7.27 (t, *J* = 7.3 Hz, 1H), 7.22 (d, *J* = 7.8 Hz, 2H).

#### References:

- (1) Liu, C.; Shi, S.; Liu, Y.; Liu, R.; Lalancette, R.; Szostak, R.; Szostak, M. *Org. Lett.* **2018**, *20*, 7771-7774.
- (2) Wang, Z. H.; Wang, X.; Nishihara, Y. *Chem. Comm.* **2018**, *54*, 13969-13972.
- (3) Panja, S.; Maity, P.; Ranu, B. C. *J Org. Chem.* **2018**, *83*, 12609-12618.
- (4) Ogawa, D.; Hyodo, K.; Suetsugu, M.; Li, J.; Inoue, Y.; Fujisawa, M.; Iwasaki, M.; Takagi, K.; Nishihara, Y. *Tetrahedron* **2013**, *69*, 2565-2571.
- (5) Wang, T.; Guo, J. R.; Wang, H. J.; Guo, H.; Jia, D. L.; Zhang, W.; Liu, L. T. *J Organomet Chem.* **2018**, *877*, 80-84.
- (6) Basu, P.; Riyajuddin, S.; Dey, T.; Ghosh, A.; Ghosh, K.; Islam, Sk. *J Organomet. Chem.* **2018**, *877*, 37-50.
- (7) Chen, C. P.; Liu, P.; Luo, M. M; Zeng, X. M. Kumada. *ACS Catalysis.* **2018**, *8*, 5864-5868.
- (8) Gan, Y.; Wang, G. N; Xie, X.; Liu, Y. H. *J Org. Chem.* **2018**, *83*, 14036-14048.
- (9) Liu, C. W.; Li, G. C.; Shi, S. C.; Meng, G. R.; Lalancette, R.; Szostak, R.; Szostak, M. *ACS Catalysis.* **2018**, *8*, 9131-9139.
- (10) Li, J. S.; Yang, Q.; Yang, F.; Chen, G. Q; Li, Z. W.; Kuang, Y. J.; Zhang, W. J.; Huang, P. M. *Org. Biomol. Chem.* **2018**, *16*, 140-145.
- (11) Rode, N. D.; Abdalghani, I.; Arcadi, A.; Aschi, M.; Chiarini, M.; Marinelli, F. *J Org. Chem.* **2018**, *83*, 6354-6362.
- (12) Bao, M.; Qian, Y.; Su, H.; Wu, B.; Qiu, L. H.; Hu, W. H.; Xu, X. F. *Org. Lett.* **2018**, *20*, 5332-5335.
- (13) Peng, J. B.; Wu, F. P.; Li, D.; Qi, X. X.; Ying, J.; Wu, X. F. *J Org. Chem.* **2018**, *83*, 6788-6792.
- (14) Marvel, C. S.; Kaplan, J. F.; Himel, C. M. *J Am Chem Soc.* **1941**, *63*, 1892-1896.
- (15) Agzamova, K. D.; Yuldashev, Kh. Yu. *Doklady Akademii Nauk UzSSR.* **1983**, *8*, 35-37.
- (16) Hatanaka, Y.; Hiyama, T. *Chem Lett.* **1989**, *11*, 2049-2052.
- (17) CAS:1184114-32-6

- (18) He, X.; Cao, Y.; Lang, X. D.; Wang, N.; He, L. N. *ChemSusChem*. **2018**, *11*, 3382-3387.
- (19) Carden, R. G.; Lam, N.; Widenhofer, R. A. *Chem Eur J*. **2018**, *23*, 17992-18001.
- (20) Sithebe, S.; Molefe, P. *J Organomet. Chem.* **2017**, *846*, 305-311.
- (21) Garrison Kinney, R.; Tjutrins, J.; Torres, G. M.; Liu, N. J.; Kulkarni, O.; Arndtsen, B. A. *Nature Chem*. **2018**, *10*, 193-199.
- (22) Garcia-Barrantes, P. M.; McGowan, K.; Ingram, S. W.; Lindsley, C. W. *Tetrahedron Lett*. **2017**, *58*, 898-901.
- (23) Ibrahim, M.; Malik, I.; Mansour, W.; Sharif, M.; Fettouhi, M.; El Ali, B. *J Organomet. Chem.* **2018**, *859*, 44-51.
- (24) Kong, W.; Li, B.; Xu, X.; Song, Q. *J. Org. Chem.* **2016**, *81*, 8436-8443.

#### 4. <sup>1</sup>H NMR and <sup>13</sup>C NMR Spectra of the Products

<sup>1</sup>H NMR of phenyl(p-tolyl)methanone **3aa**

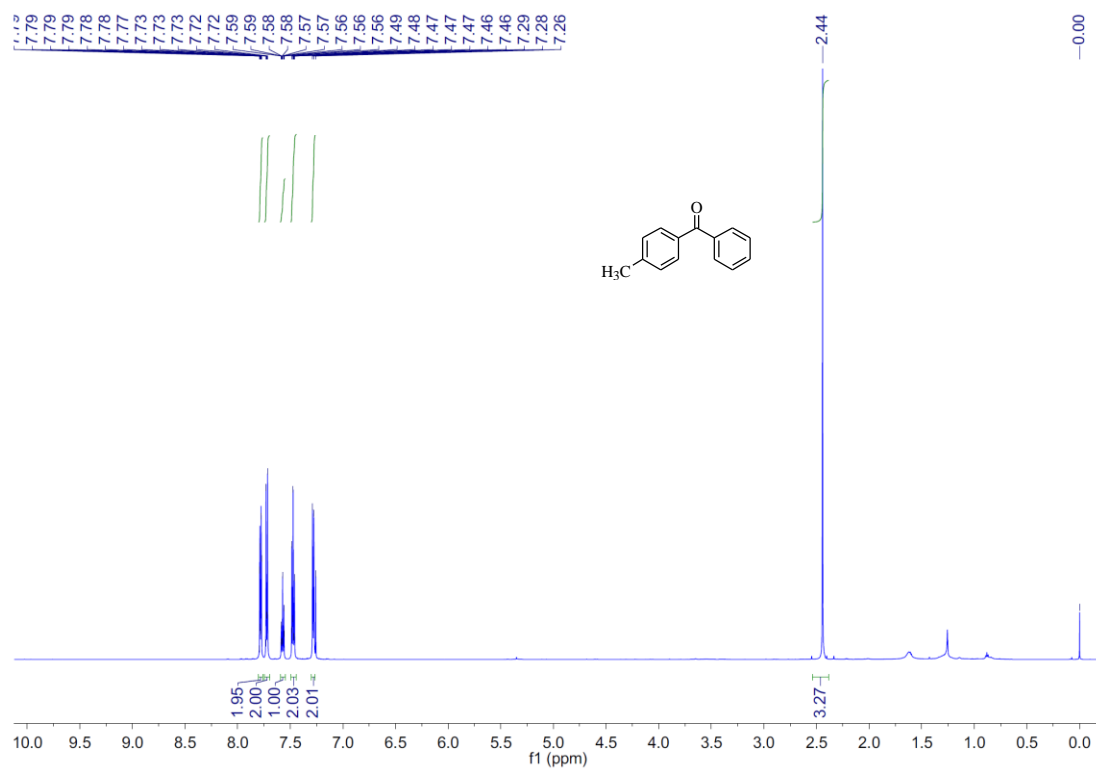

<sup>13</sup>C NMR of phenyl(p-tolyl)methanone **3aa**

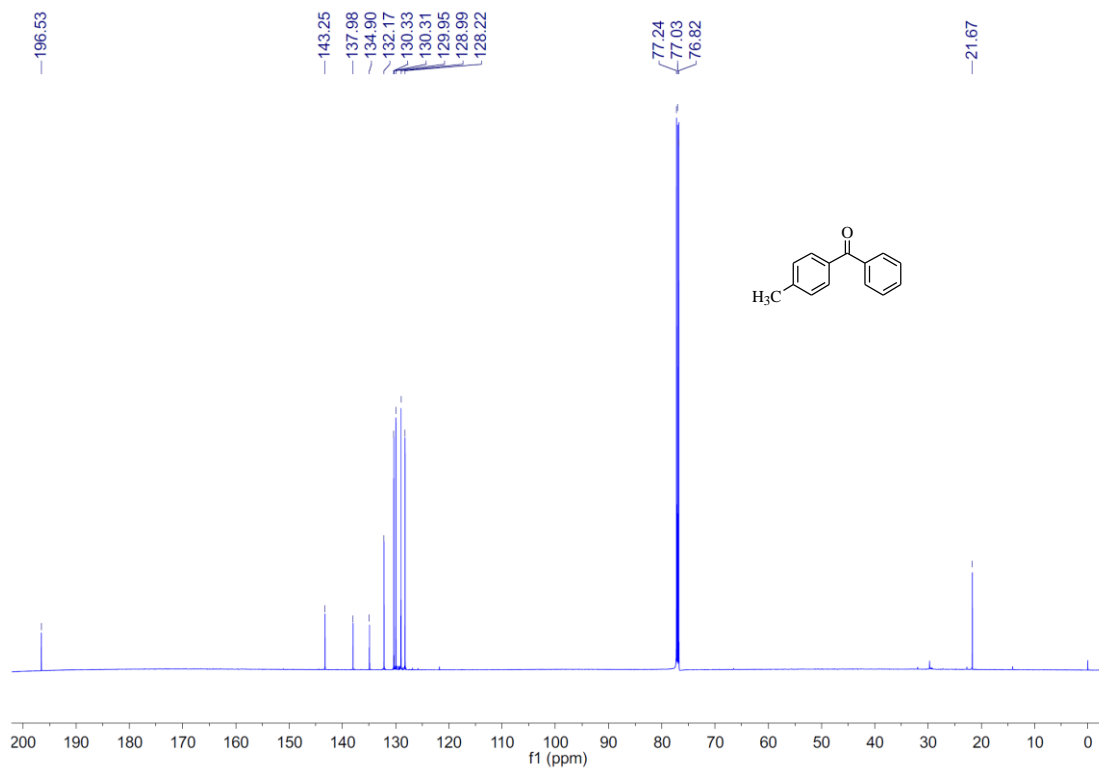

<sup>1</sup>H NMR of benzophenone **3ba**

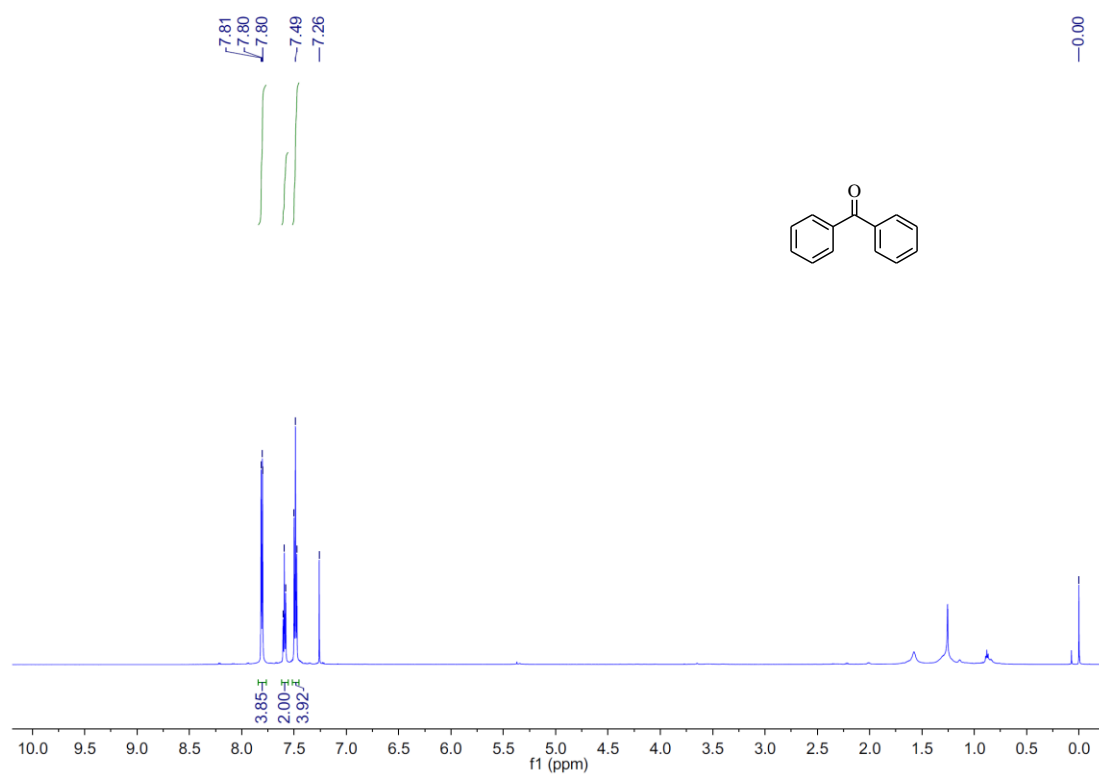

<sup>13</sup>C NMR of benzophenone **3ba**

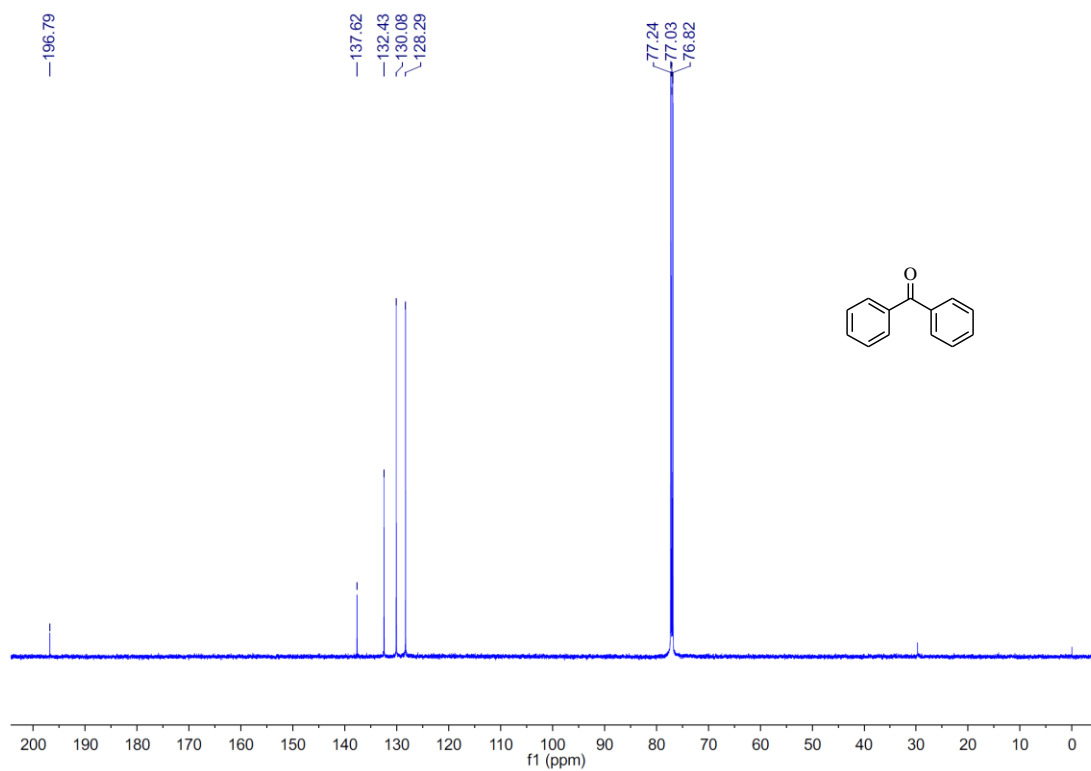

<sup>1</sup>H NMR of phenyl(o-tolyl)methanone **3ca**

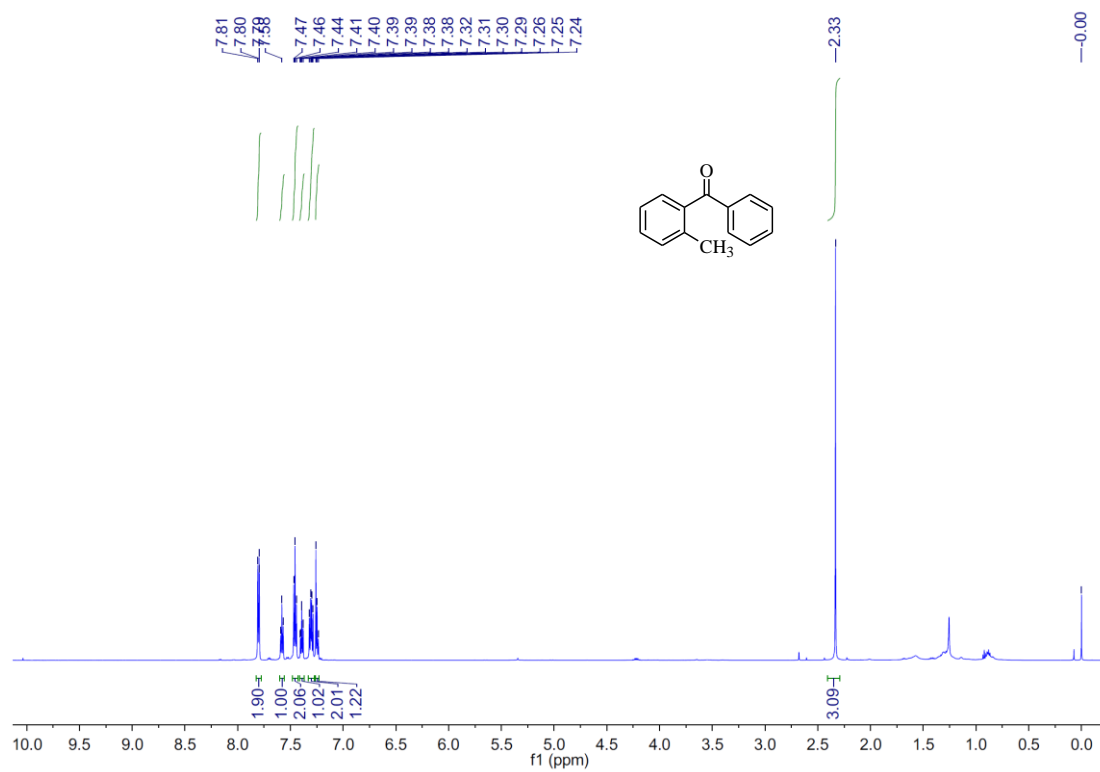

**<sup>13</sup>C NMR of phenyl(o-tolyl)methanone 3ca**

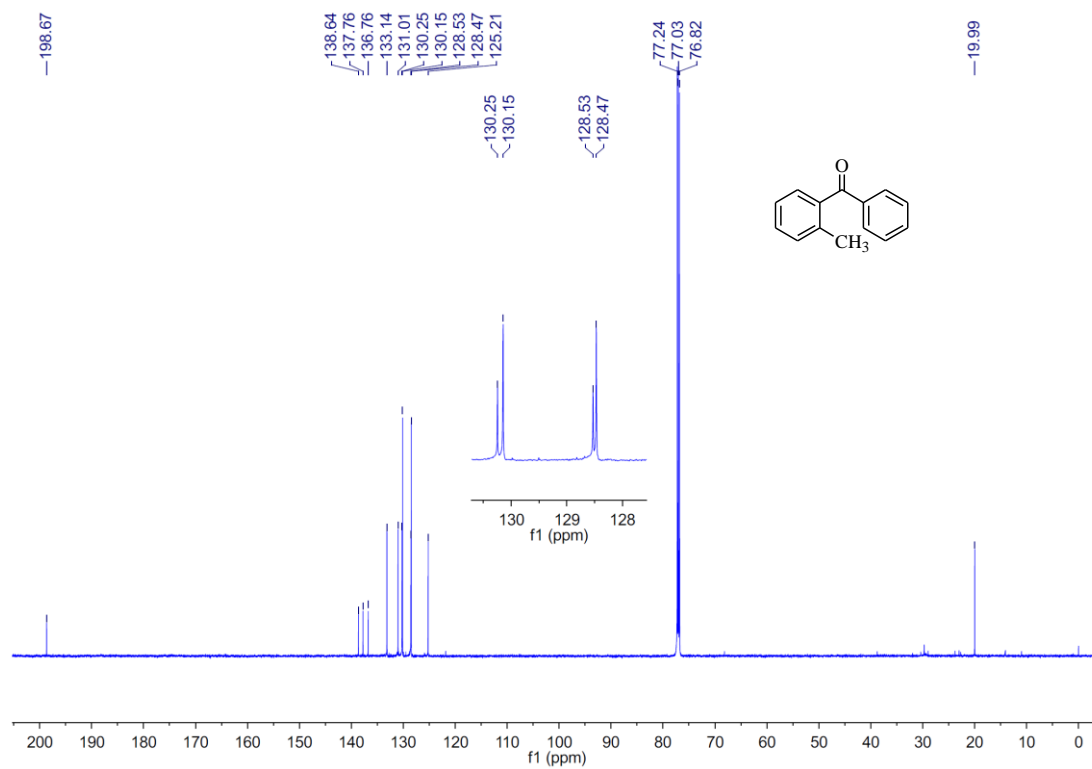

**<sup>1</sup>H NMR of phenyl(m-tolyl)methanone 3da**

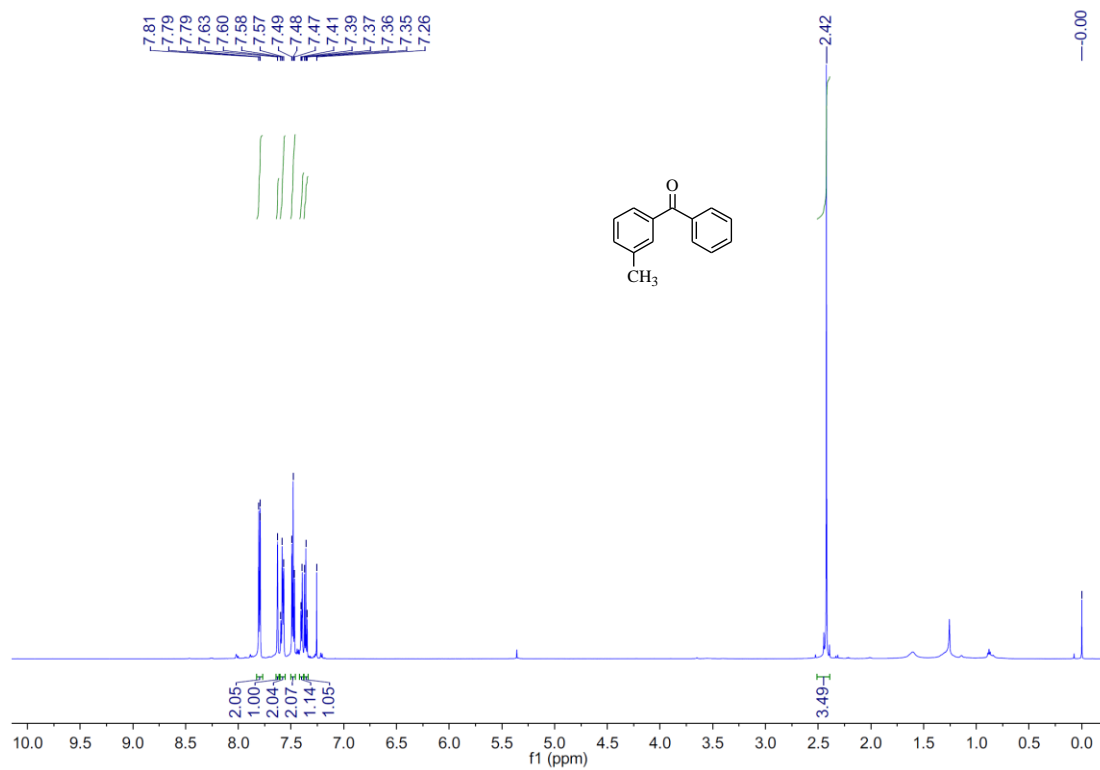

**<sup>13</sup>C NMR of phenyl(m-tolyl)methanone 3da**

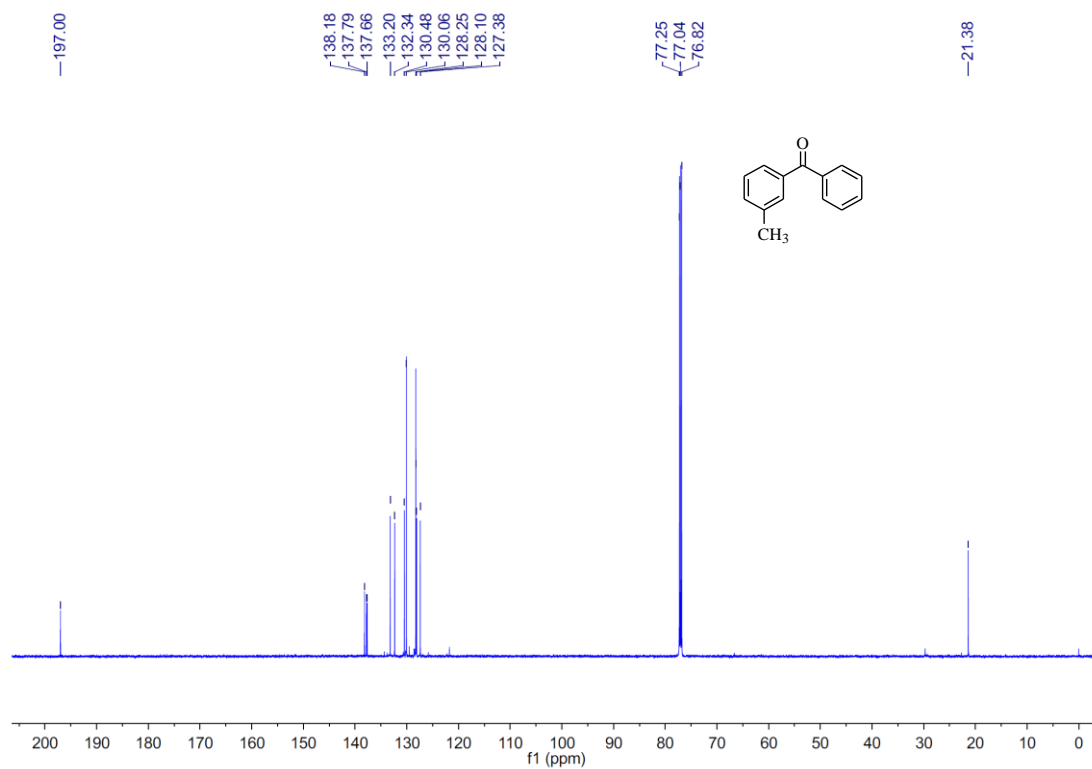

**<sup>1</sup>H NMR of (4-butylphenyl)(phenyl)methanone 3ea**

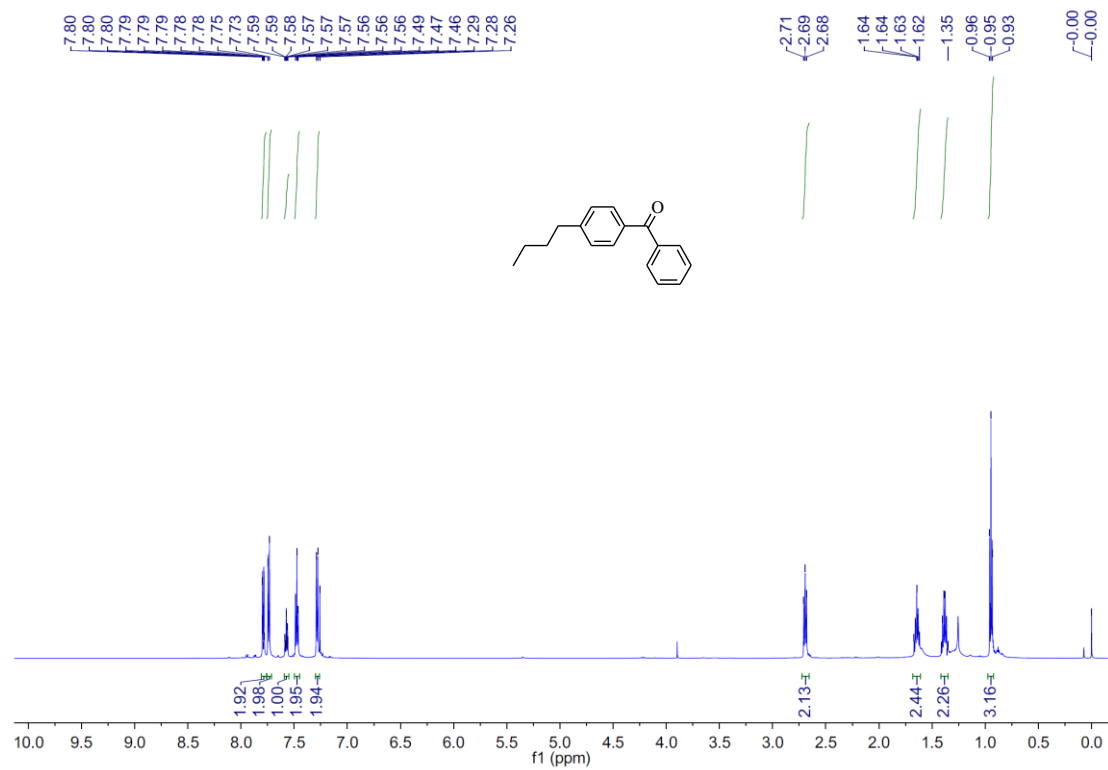

**<sup>13</sup>C NMR of (4-butylphenyl)(phenyl)methanone **3ea****

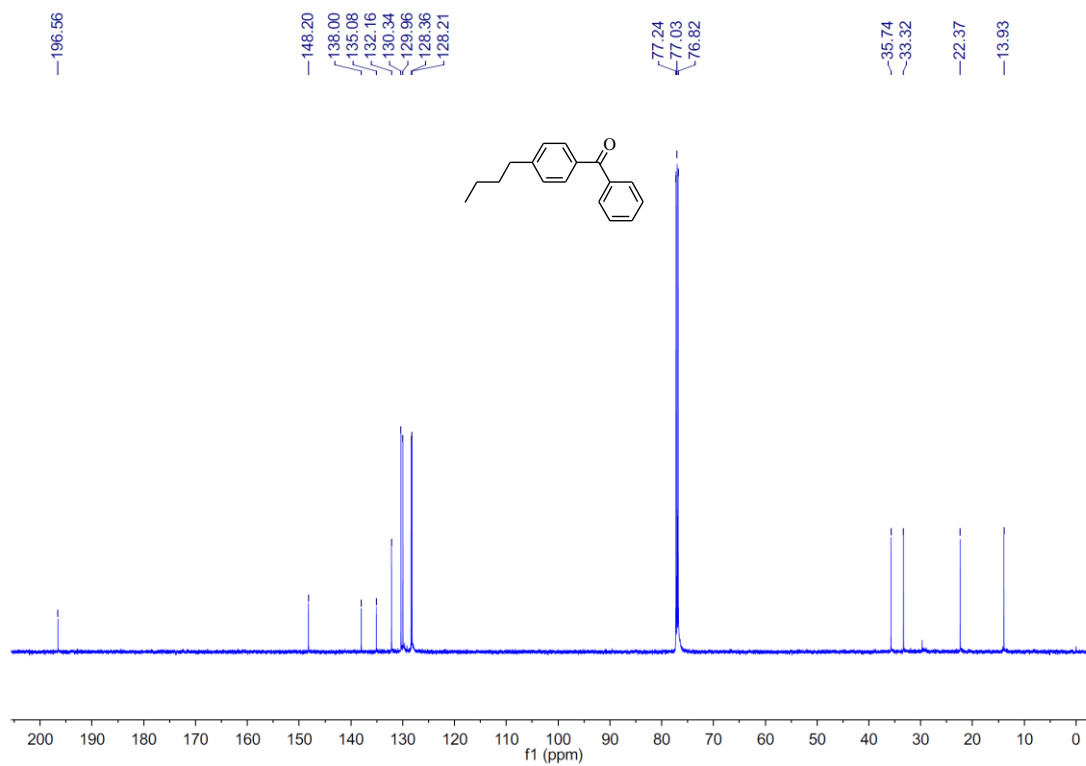

**<sup>1</sup>H NMR of (4-tert-butylphenyl)(phenyl)methanone **3fa****

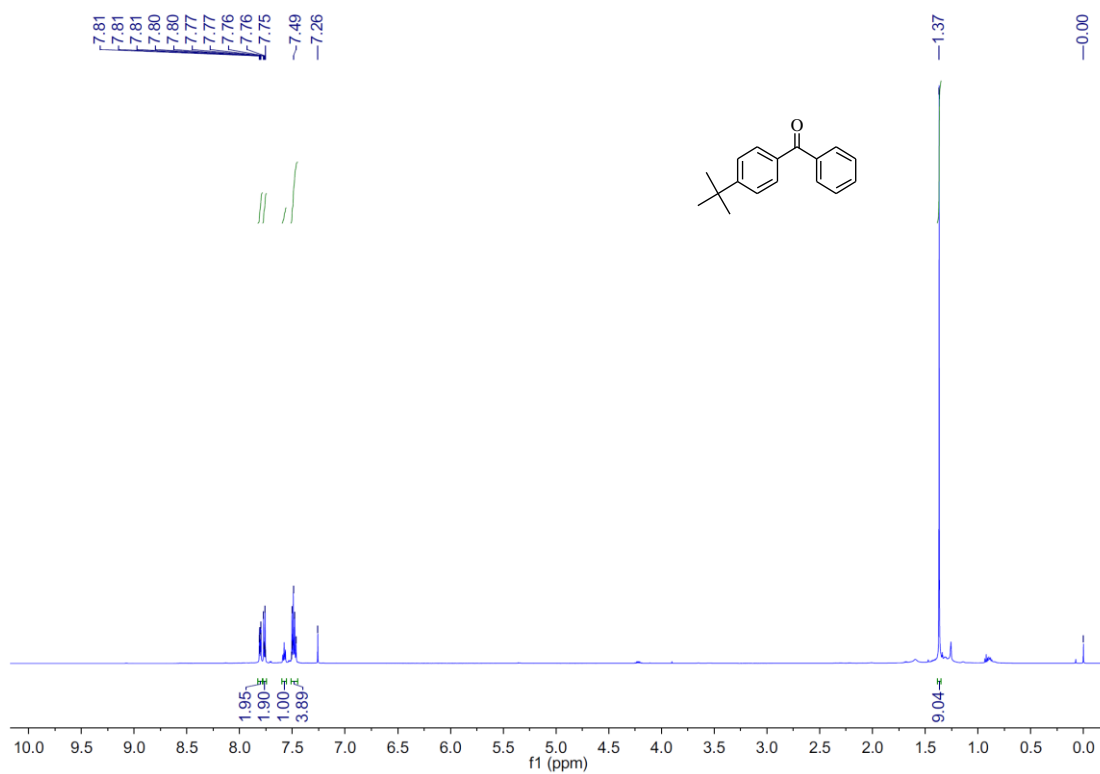

<sup>13</sup>C NMR of (4-tert-butylphenyl)(phenyl)methanone **3fa**

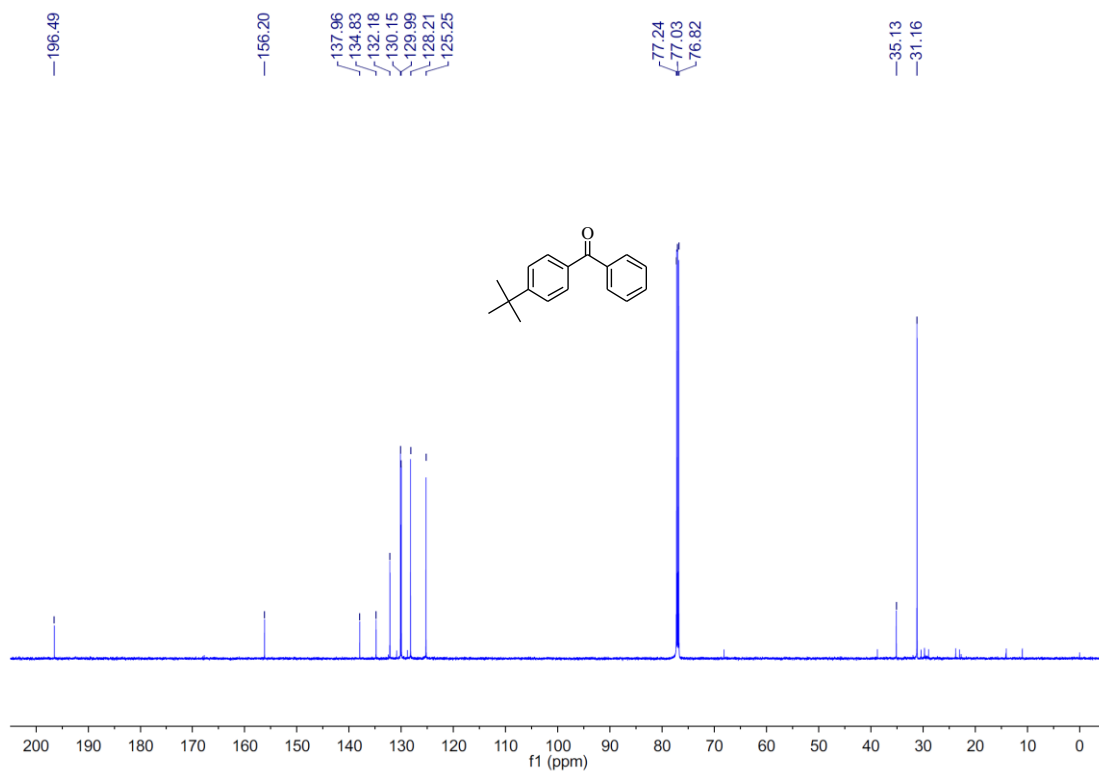

<sup>1</sup>H NMR of (4-methoxyphenyl)(phenyl)methanone **3ga**



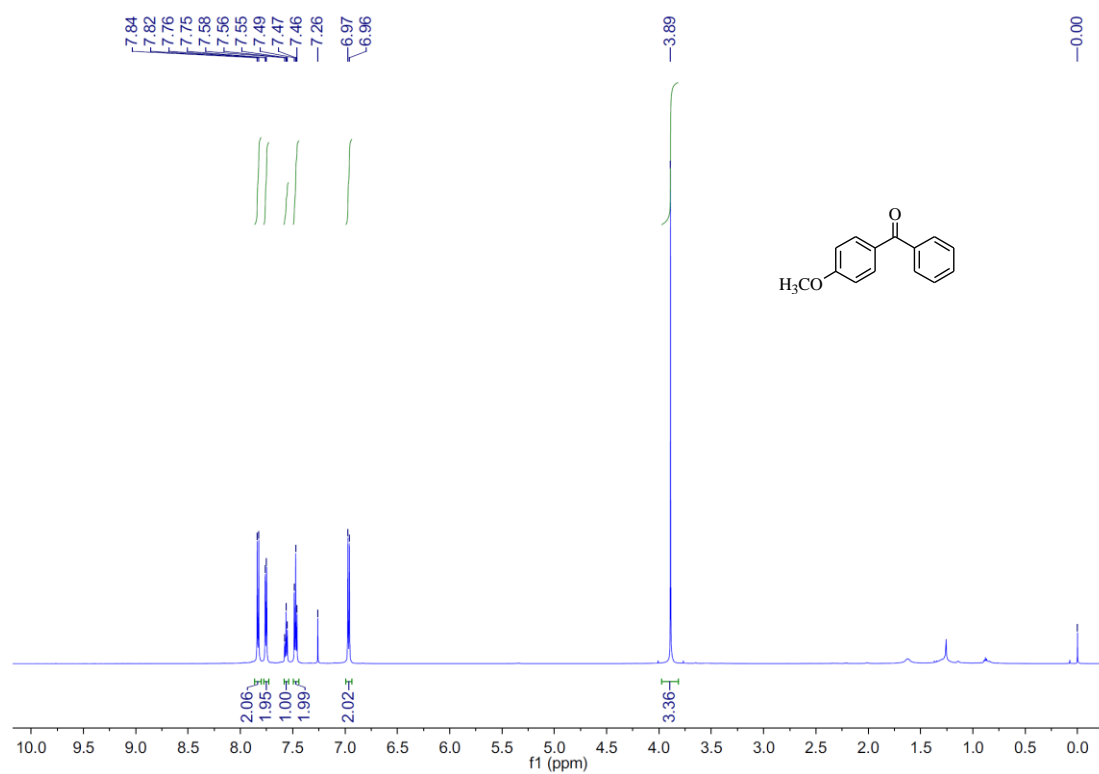

**<sup>13</sup>C NMR of (4-methoxyphenyl)(phenyl)methanone **3ga****

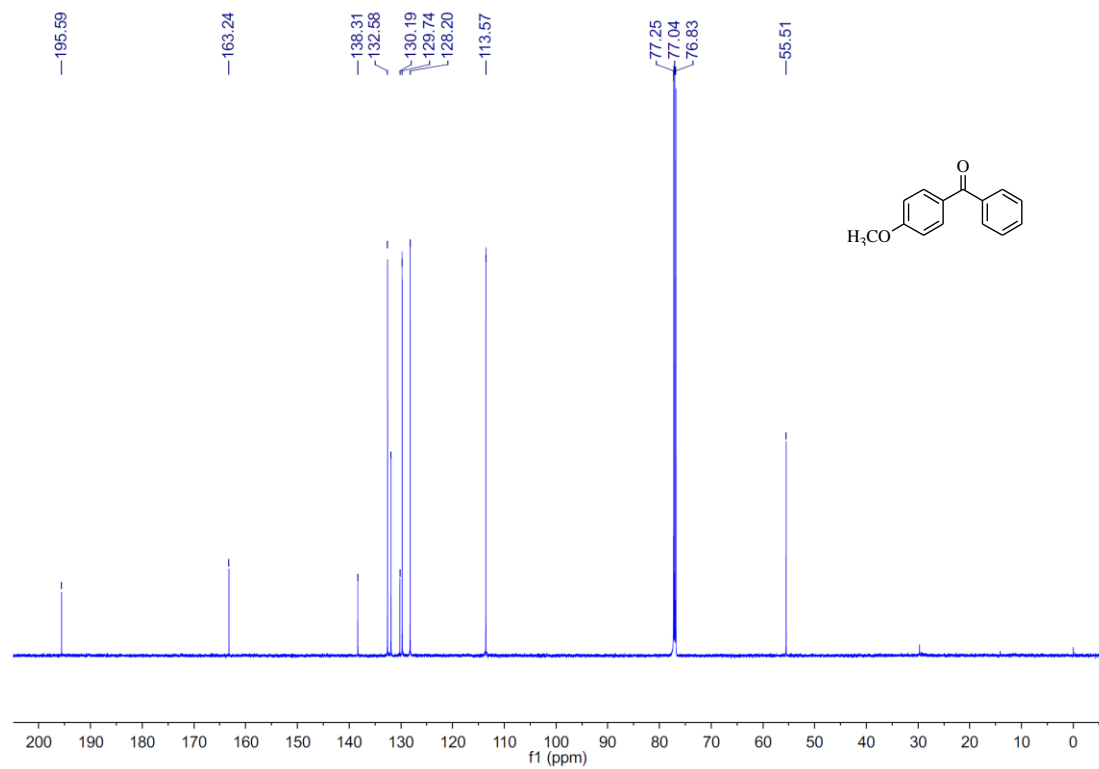

**<sup>1</sup>H NMR of (4-fluorophenyl)(phenyl)methanone **3ha****

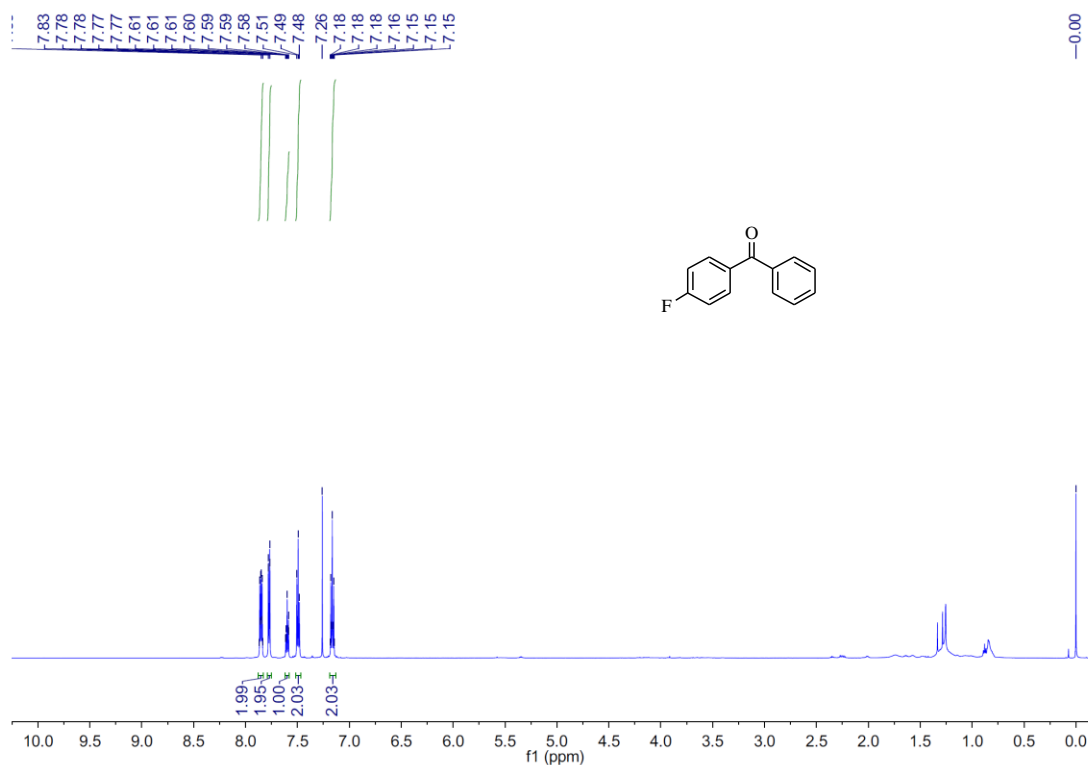

<sup>13</sup>C NMR of (4-fluorophenyl)(phenyl)methanone **3ha**

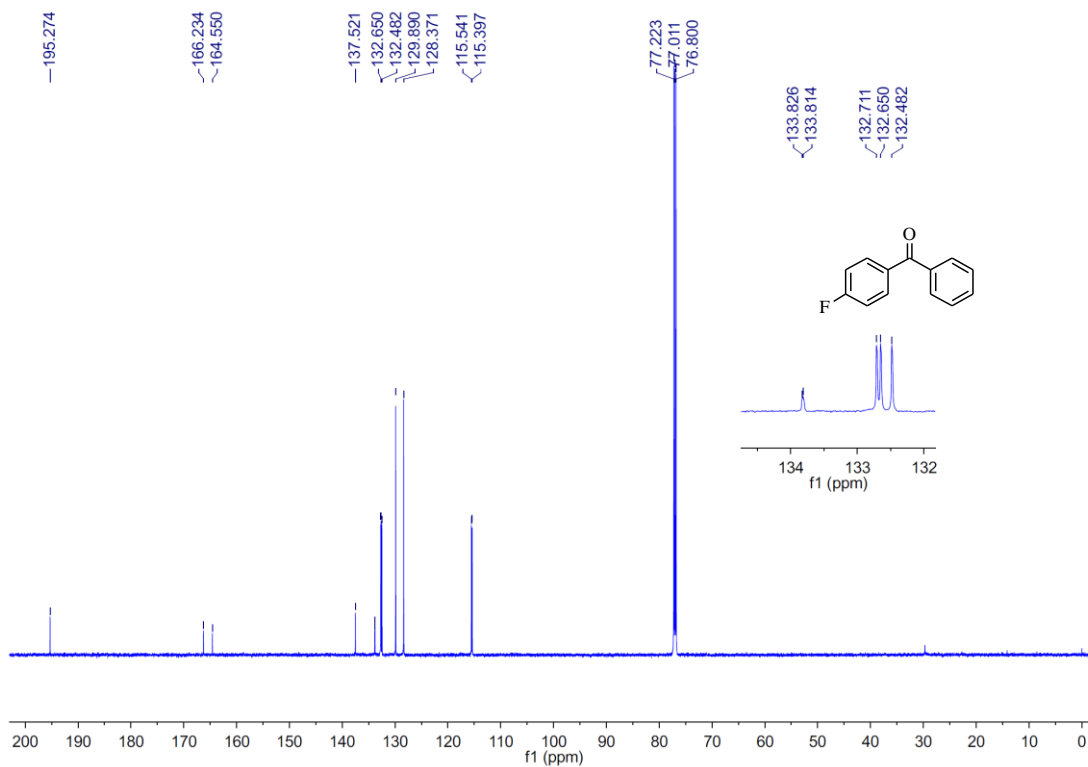

<sup>19</sup>F NMR of (4-fluorophenyl)(phenyl)methanone **3ha**

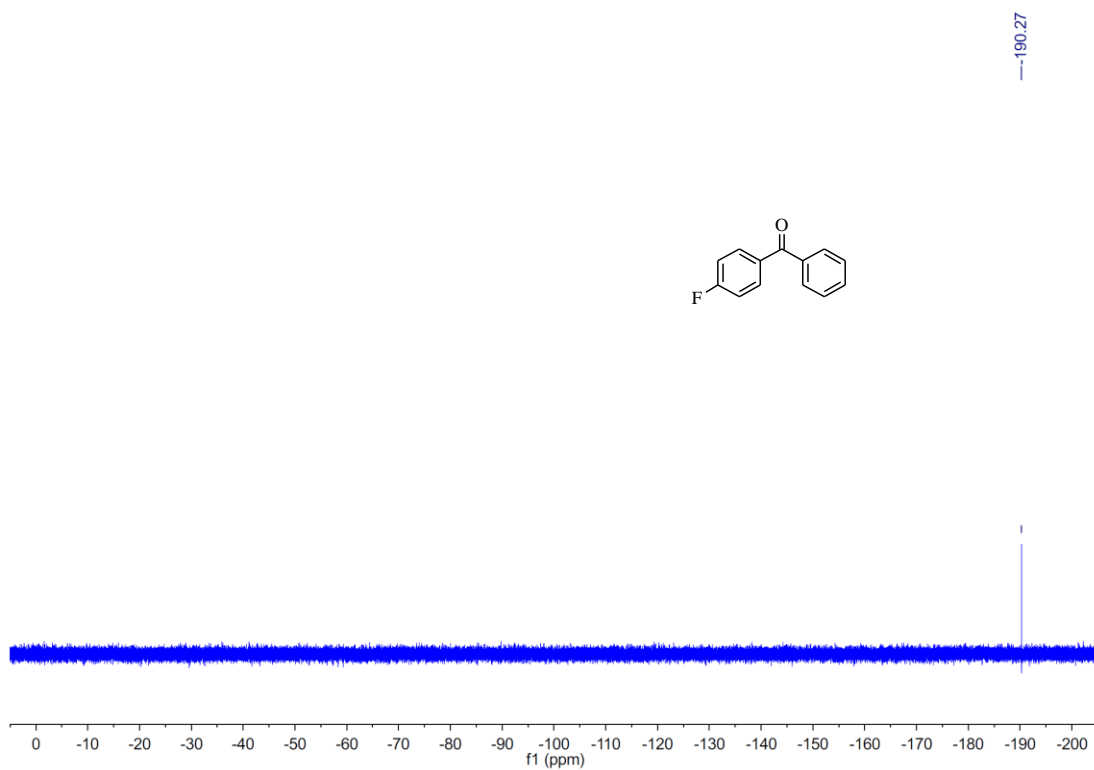

$^1\text{H}$  NMR of (4-chlorophenyl)(phenyl)methanone **3ia**

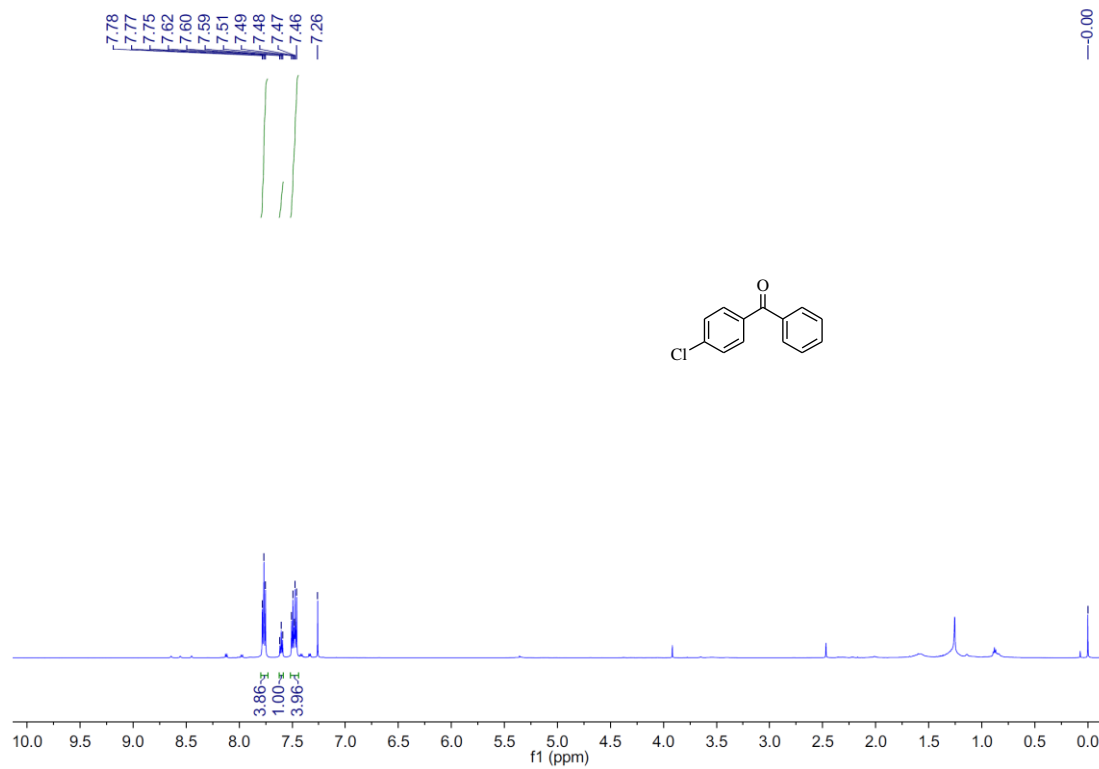

$^{13}\text{C}$  NMR of (4-chlorophenyl)(phenyl)methanone **3ia**

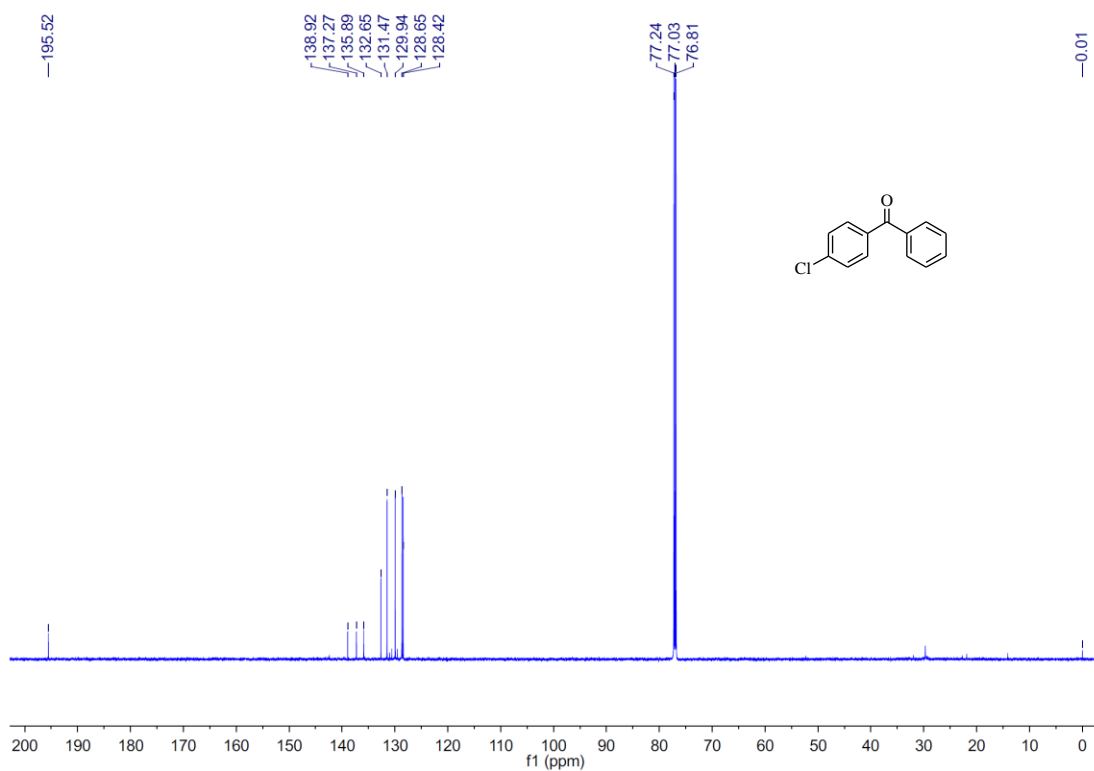

<sup>1</sup>H NMR of (3-chlorophenyl)(phenyl)methanone **3ja**

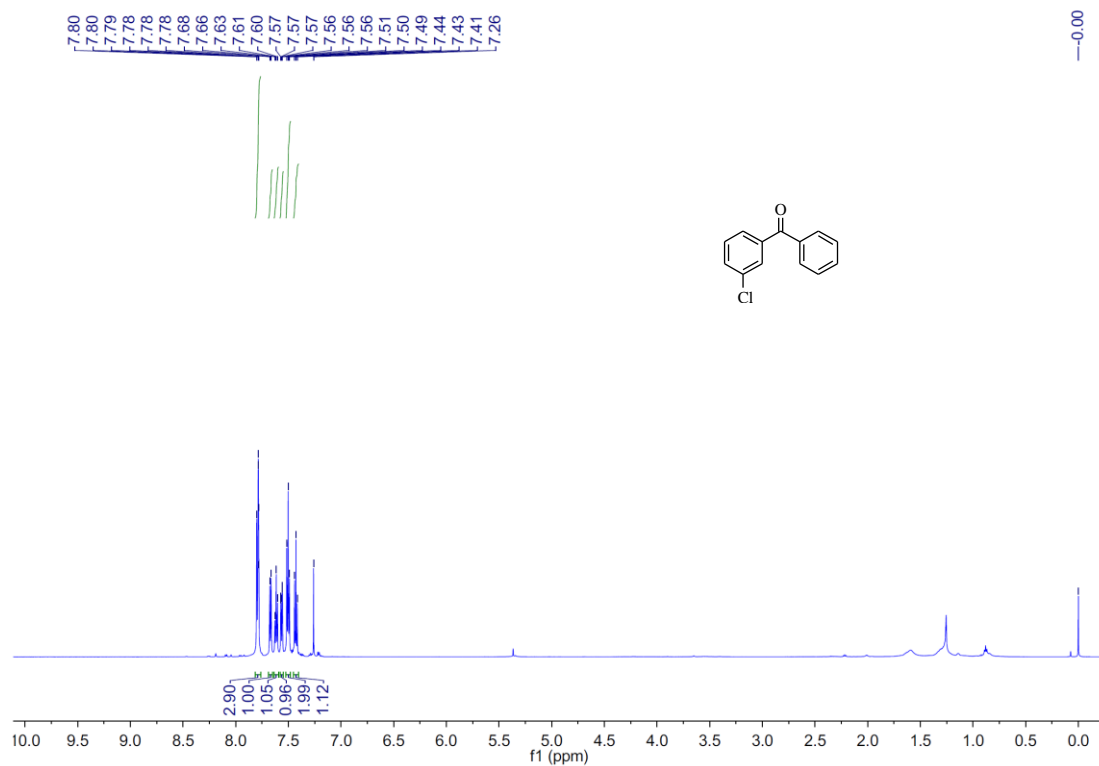

<sup>13</sup>C NMR of (3-chlorophenyl)(phenyl)methanone **3ja**

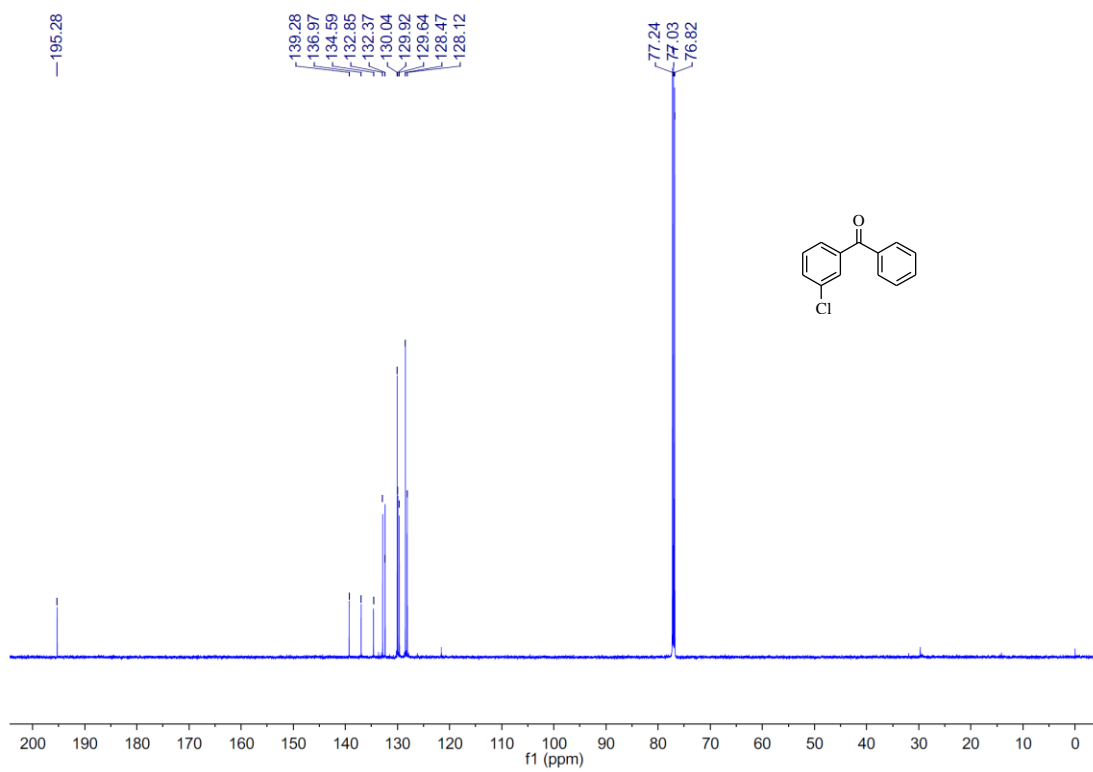

<sup>1</sup>H NMR of 4-benzoylbenzonitrile **3ka**

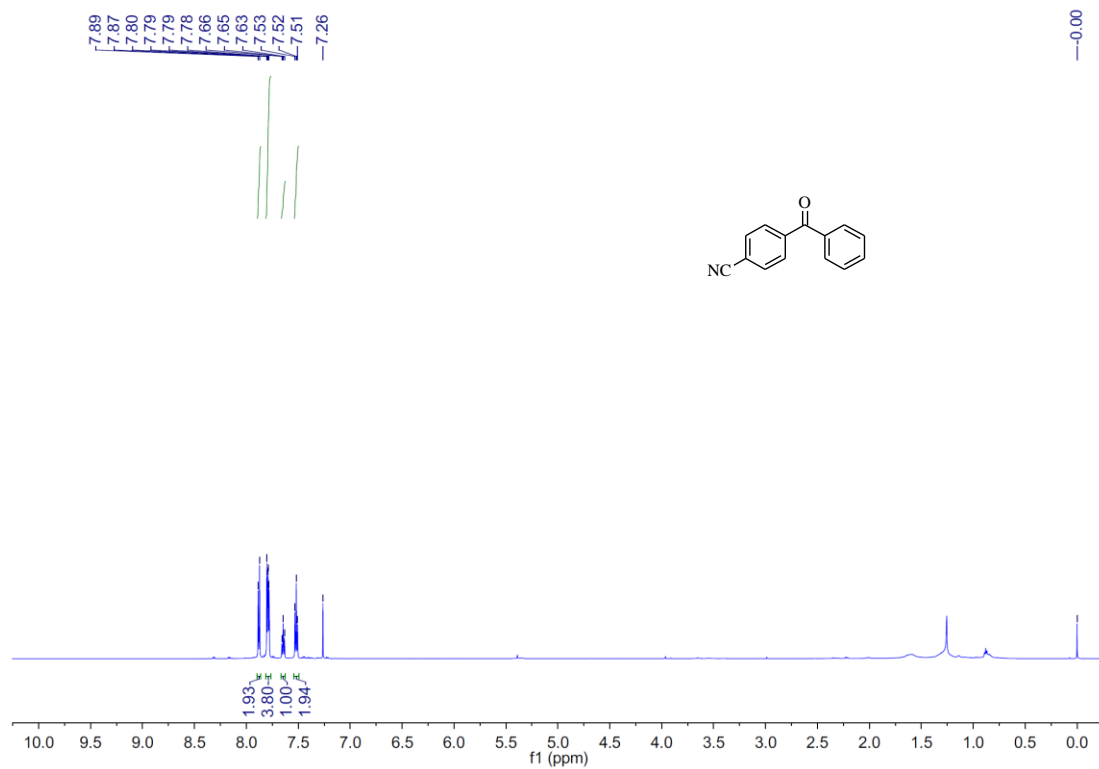

<sup>13</sup>C NMR of 4-benzoylbenzonitrile **3ka**

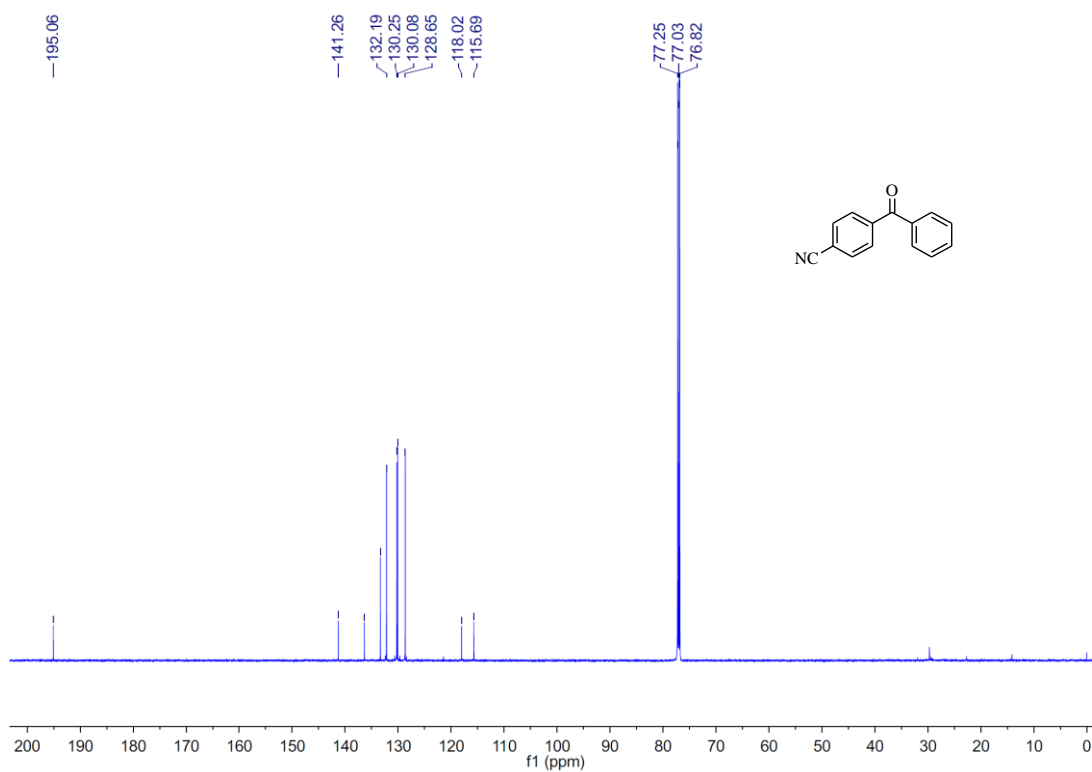

<sup>1</sup>H NMR of (4-nitrophenyl)(phenyl)methanone **3la**

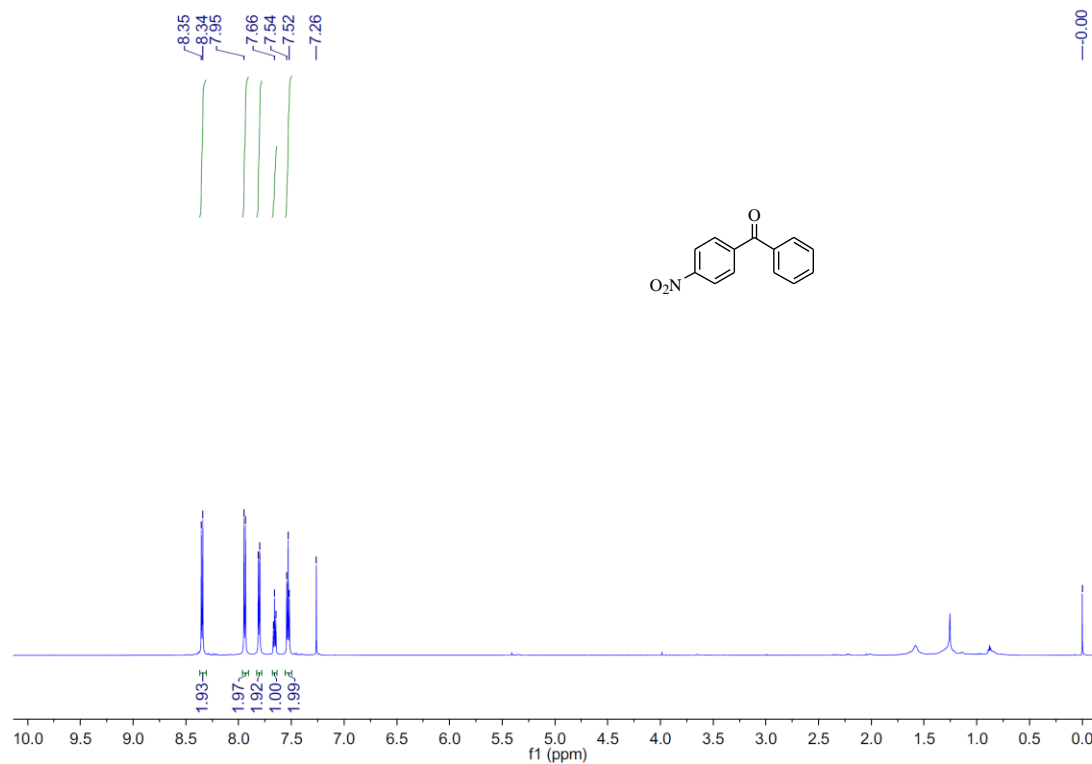

<sup>13</sup>C NMR of (4-nitrophenyl)(phenyl)methanone **3la**

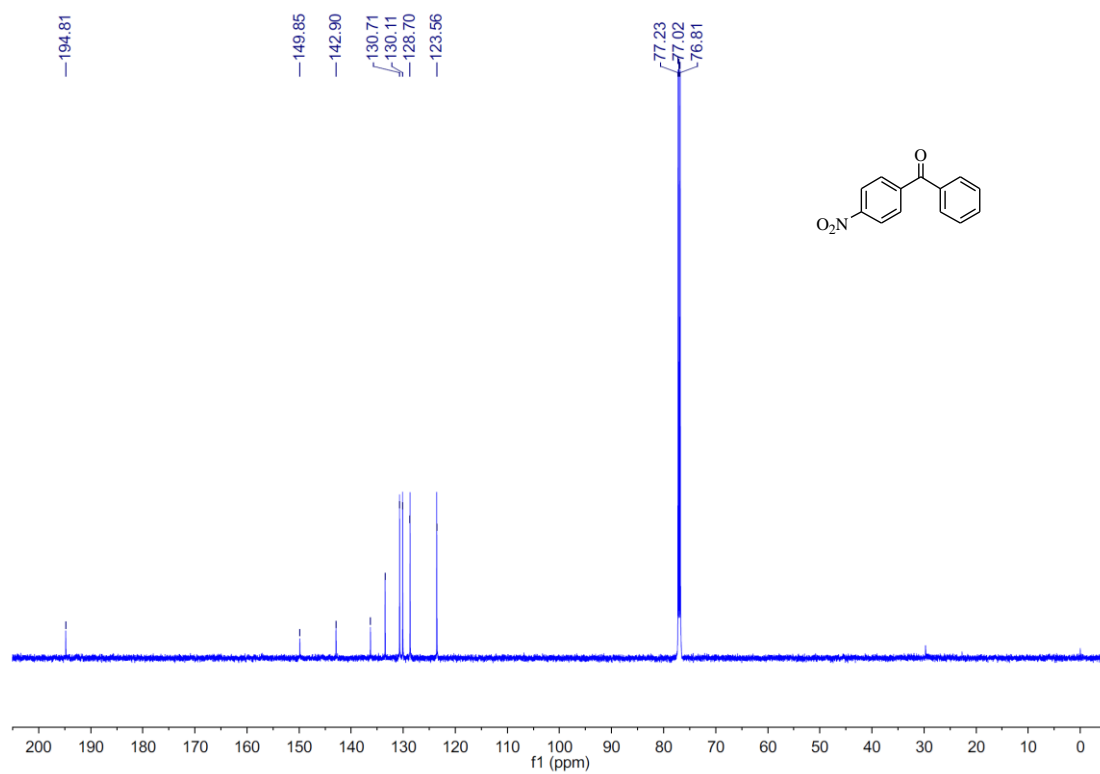

<sup>1</sup>H NMR of (3-nitrophenyl)(phenyl)methanone **3ma**

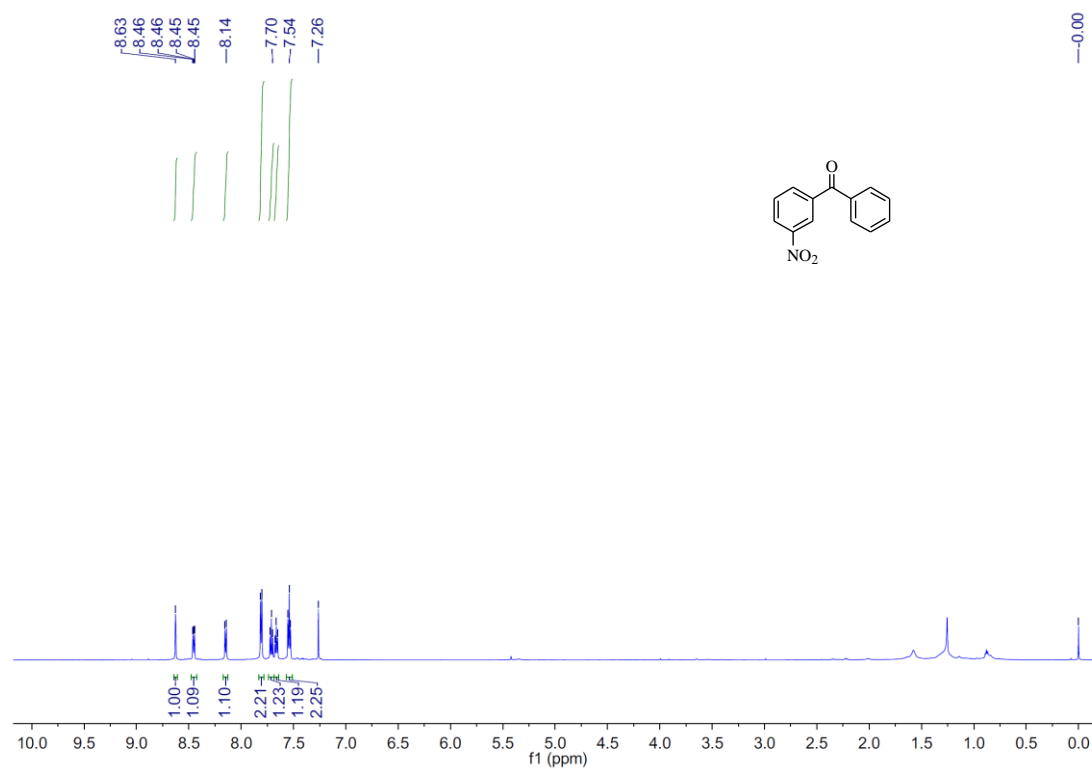

<sup>13</sup>C NMR of (3-nitrophenyl)(phenyl)methanone **3ma**

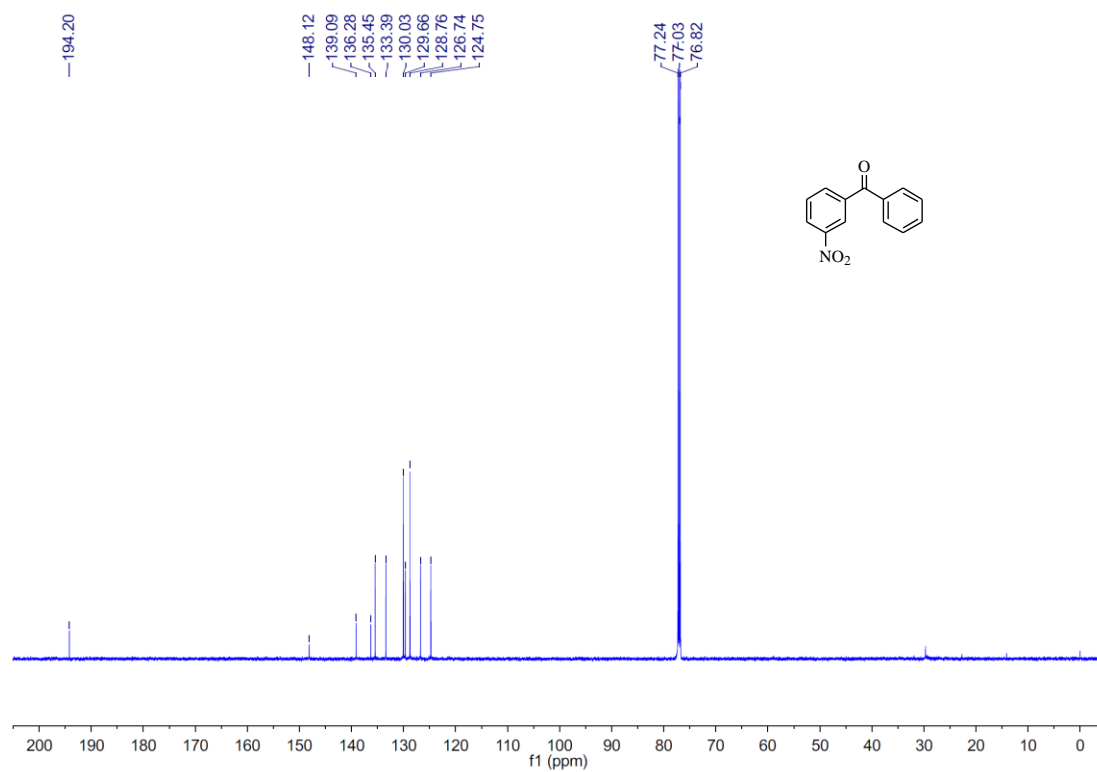

<sup>1</sup>H NMR of (2-chloro-4-nitrophenyl)(phenyl)methanone **3na**

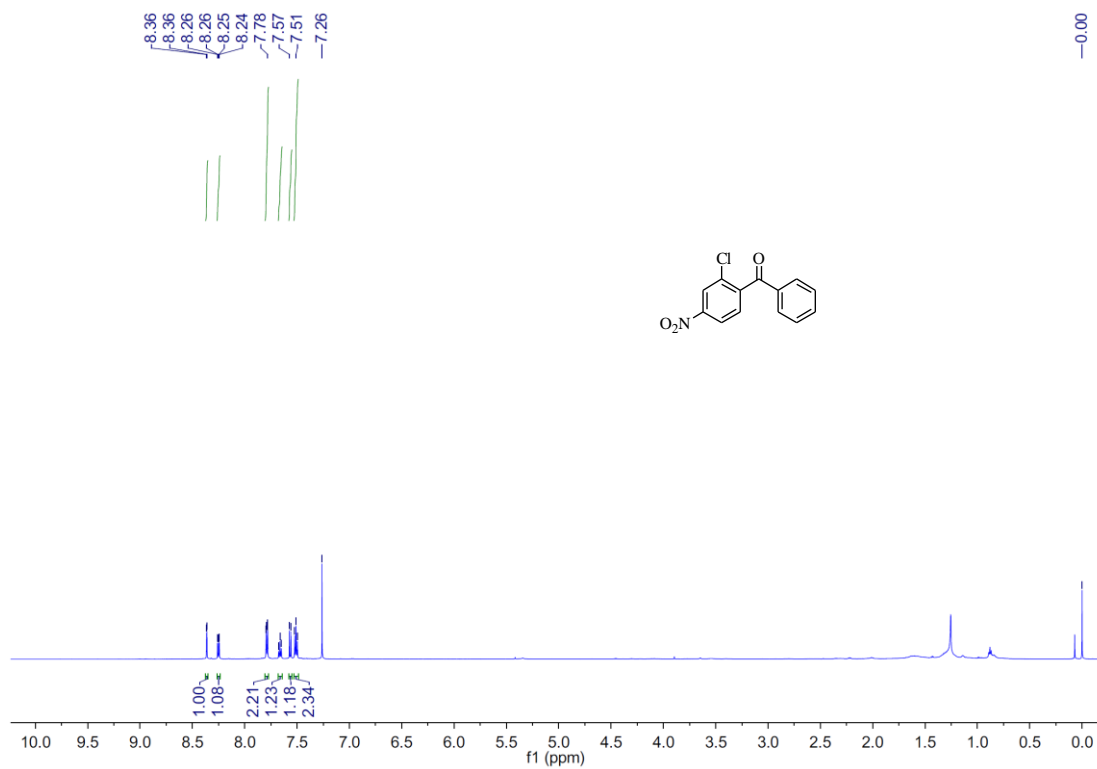

<sup>13</sup>C NMR of (2-chloro-4-nitrophenyl)(phenyl)methanone **3na**



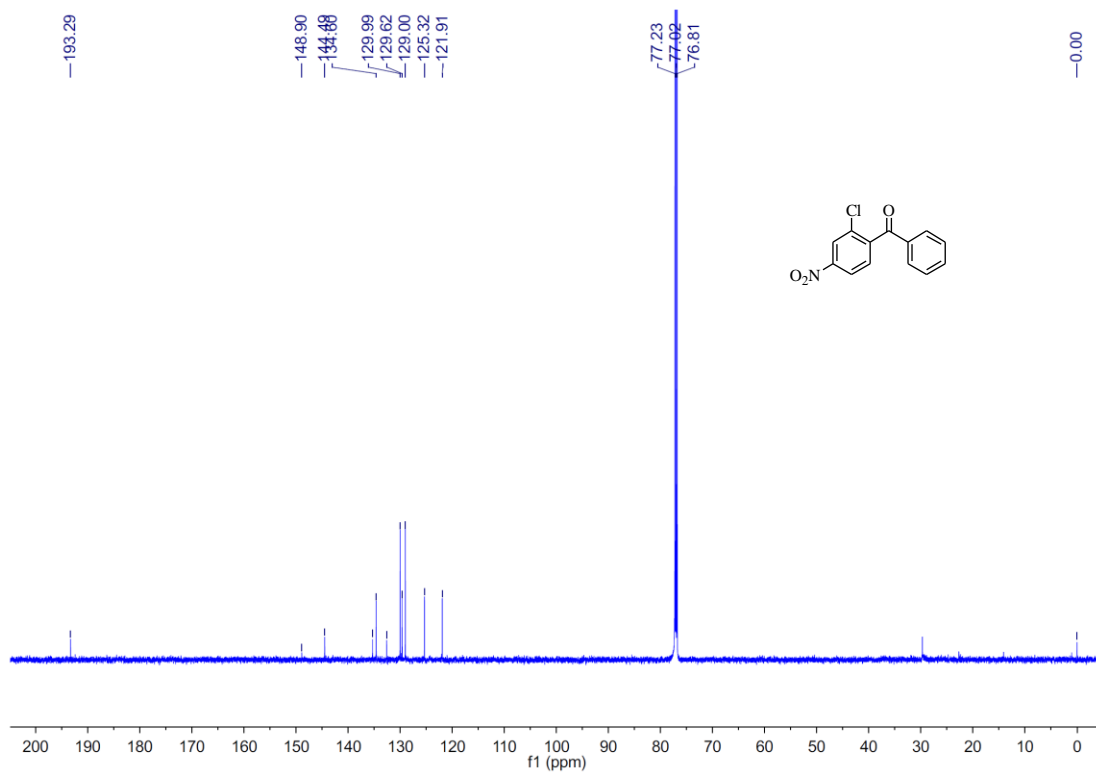

<sup>1</sup>H NMR of naphthalen-1-yl(phenyl)methanone **30a**

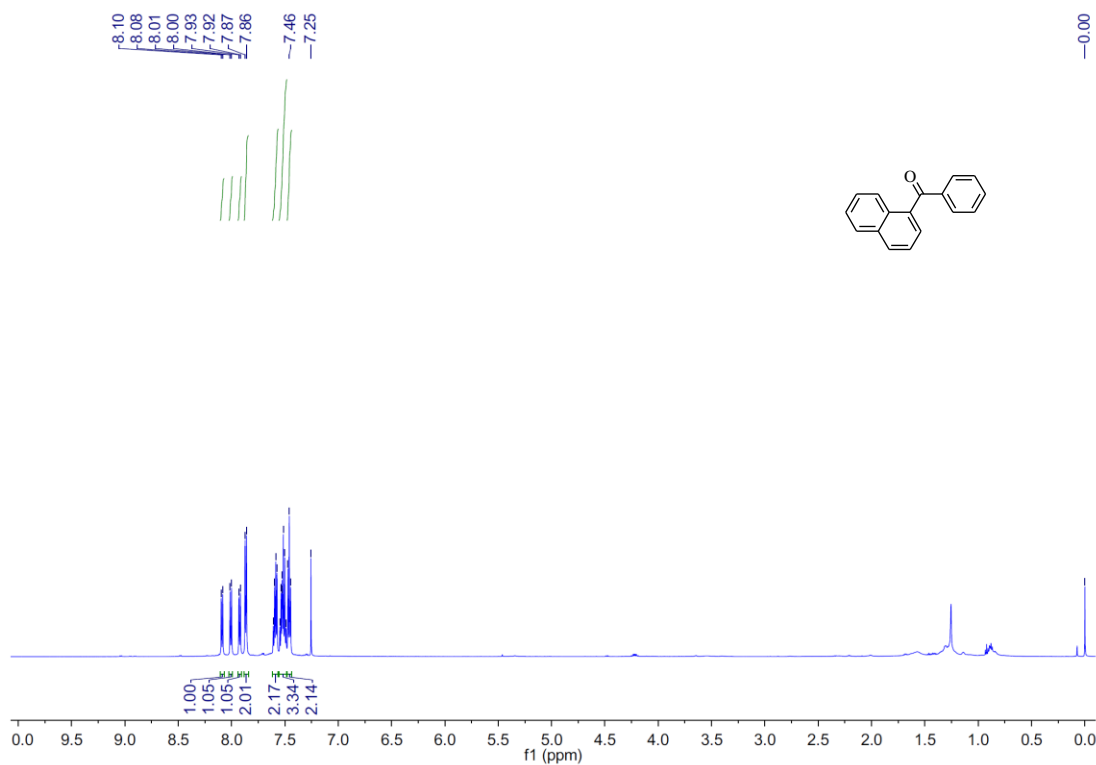

<sup>13</sup>C NMR of naphthalen-1-yl(phenyl)methanone **30a**

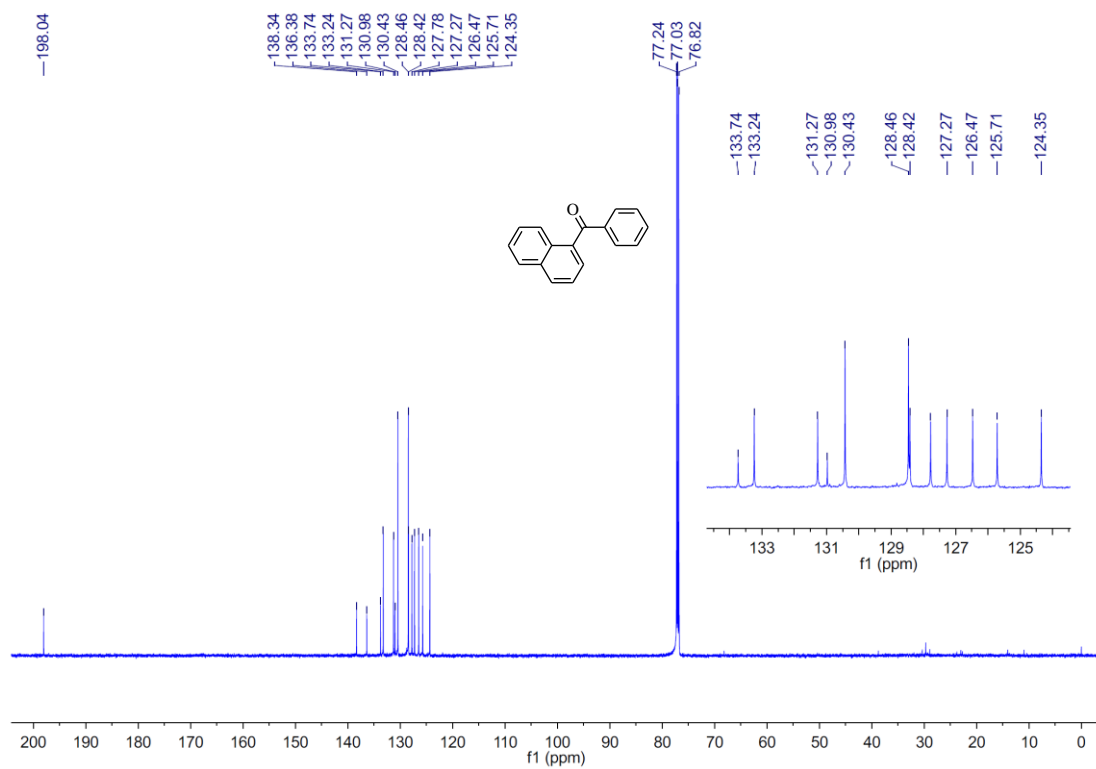

**<sup>1</sup>H NMR of (1*H*-indol-2-yl)(phenyl)methanone **3pa****

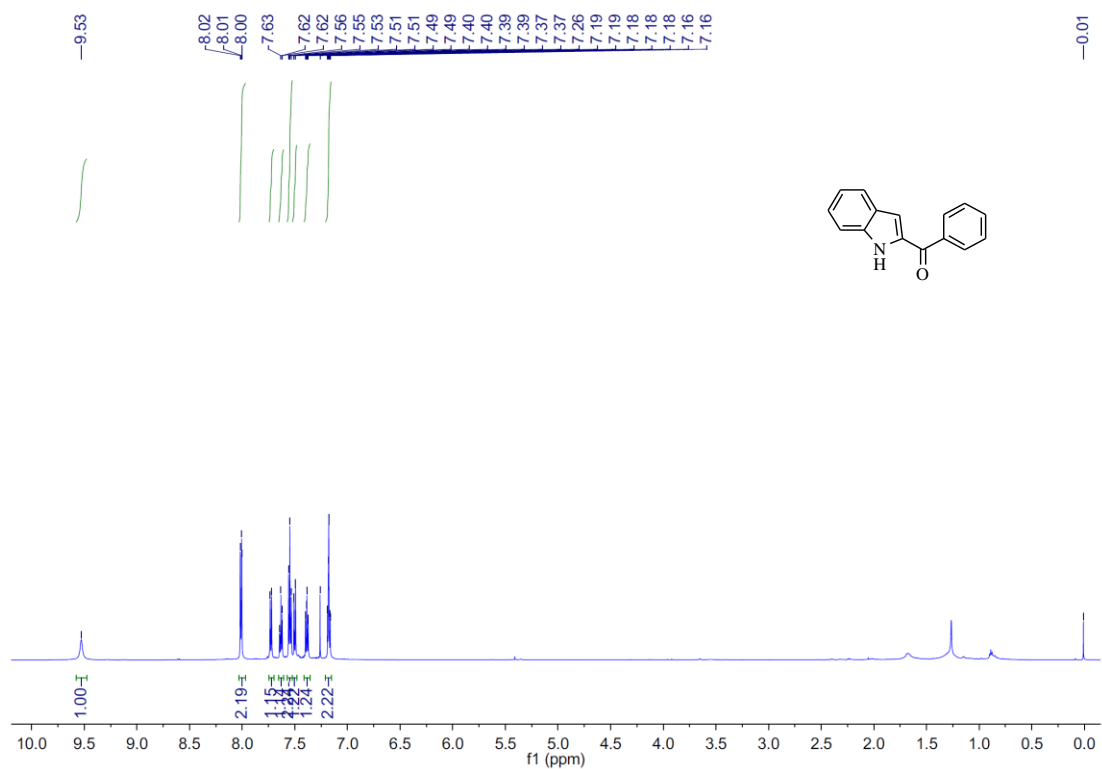

**<sup>13</sup>C NMR of (1*H*-indol-2-yl)(phenyl)methanone **3pa****

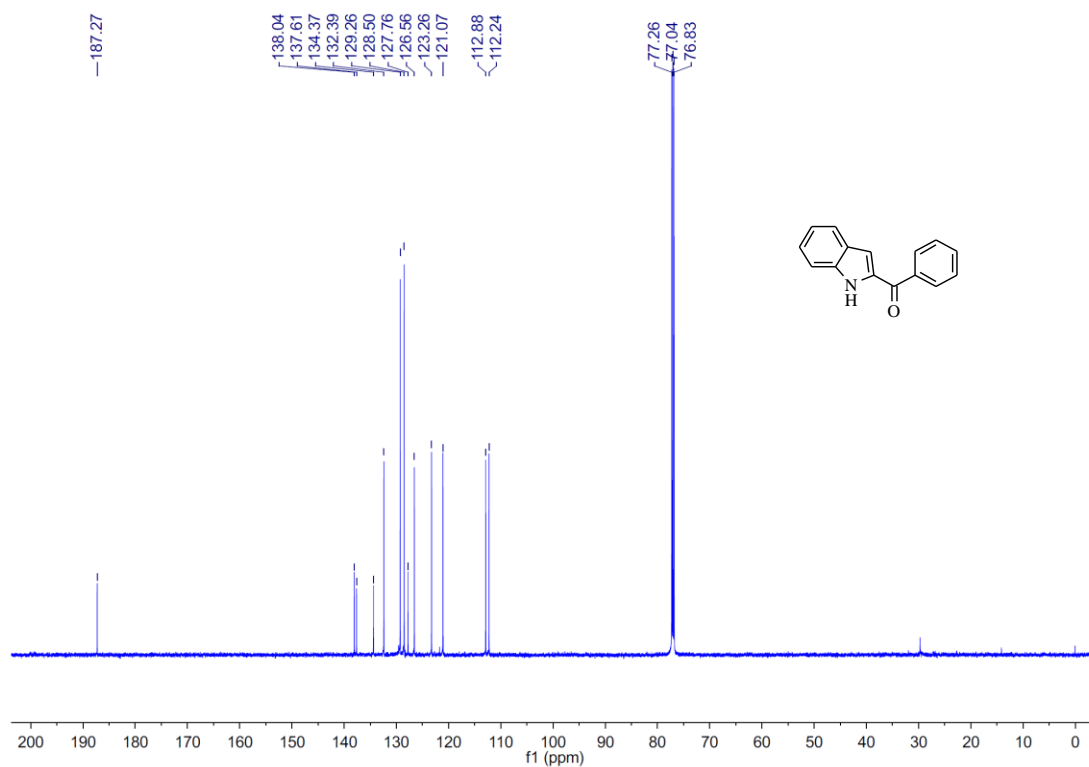

<sup>1</sup>H NMR of furan-2-yl(phenyl)methanone **3qa**

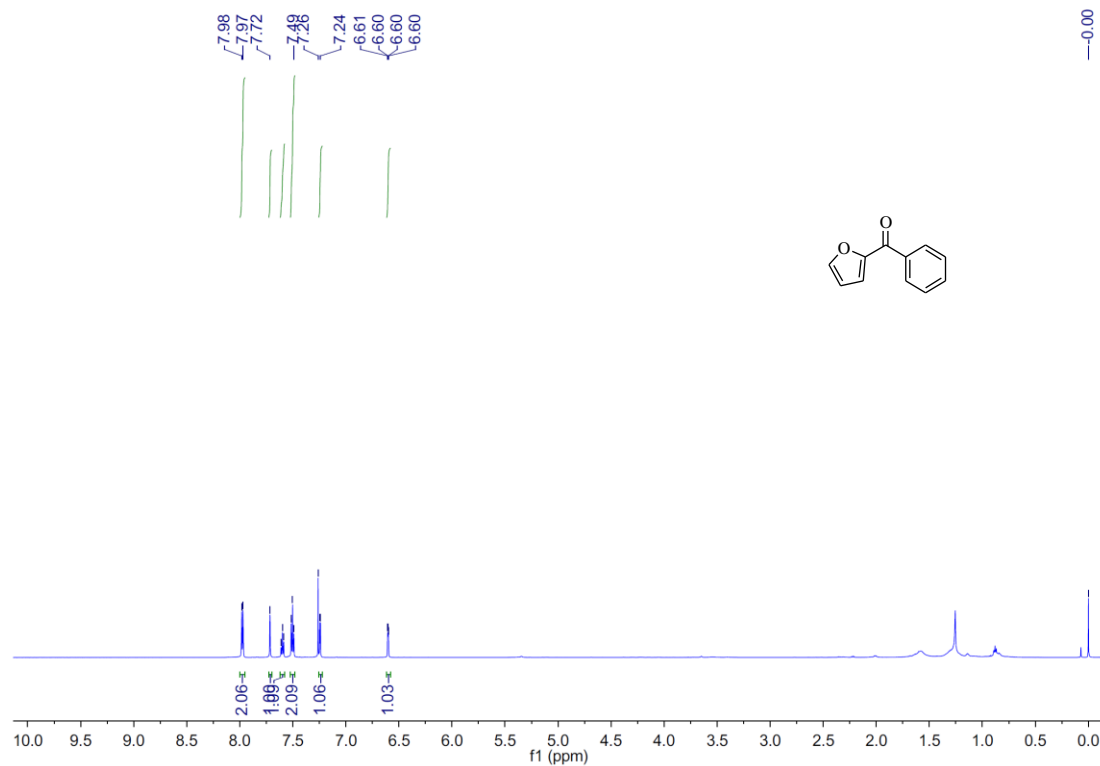

<sup>13</sup>C NMR of furan-2-yl(phenyl)methanone **3qa**

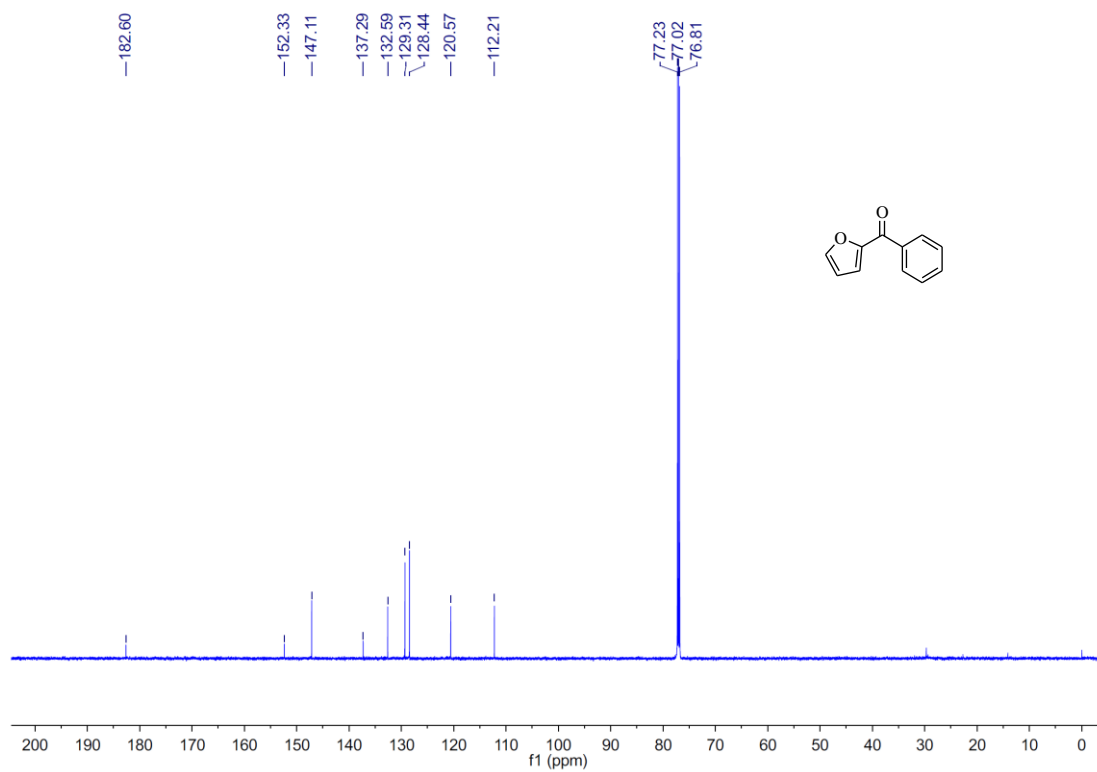

<sup>1</sup>H NMR of phenyl(thiophen-2-yl)methanone **3ra**

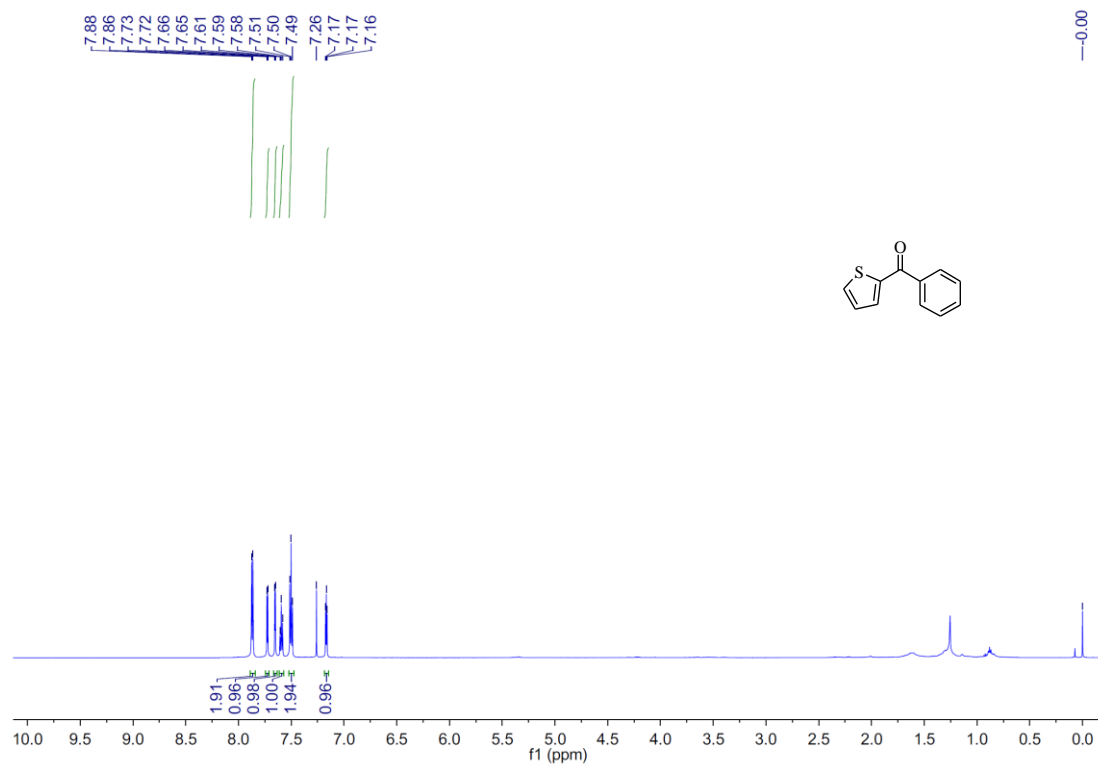

<sup>13</sup>C NMR of phenyl(thiophen-2-yl)methanone **3ra**

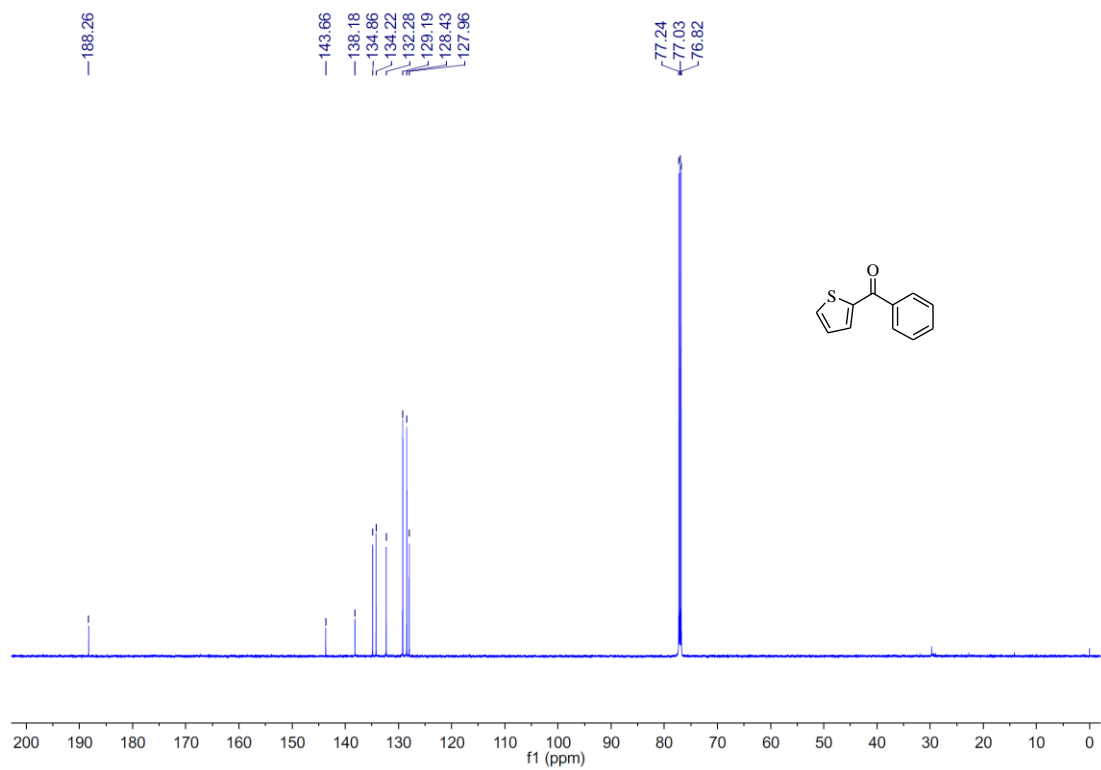

<sup>1</sup>H NMR of di-p-tolyl-methanone **3ab**

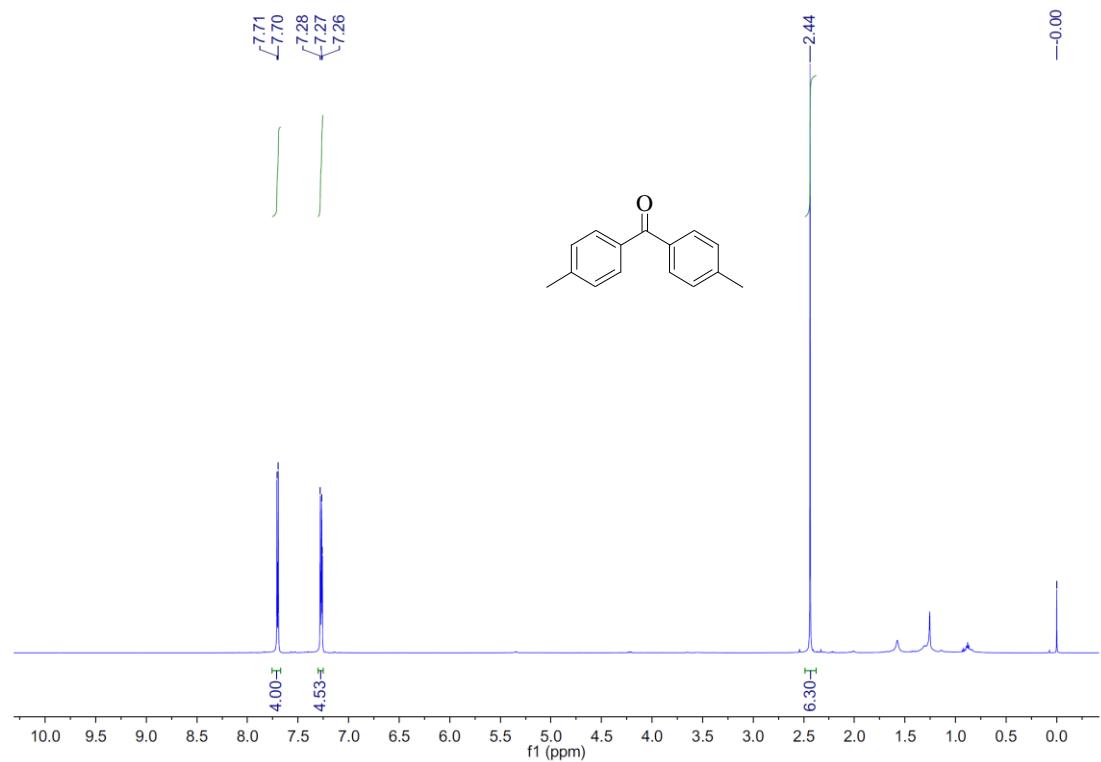

<sup>13</sup>C NMR of di-p-tolyl-methanone **3ab**

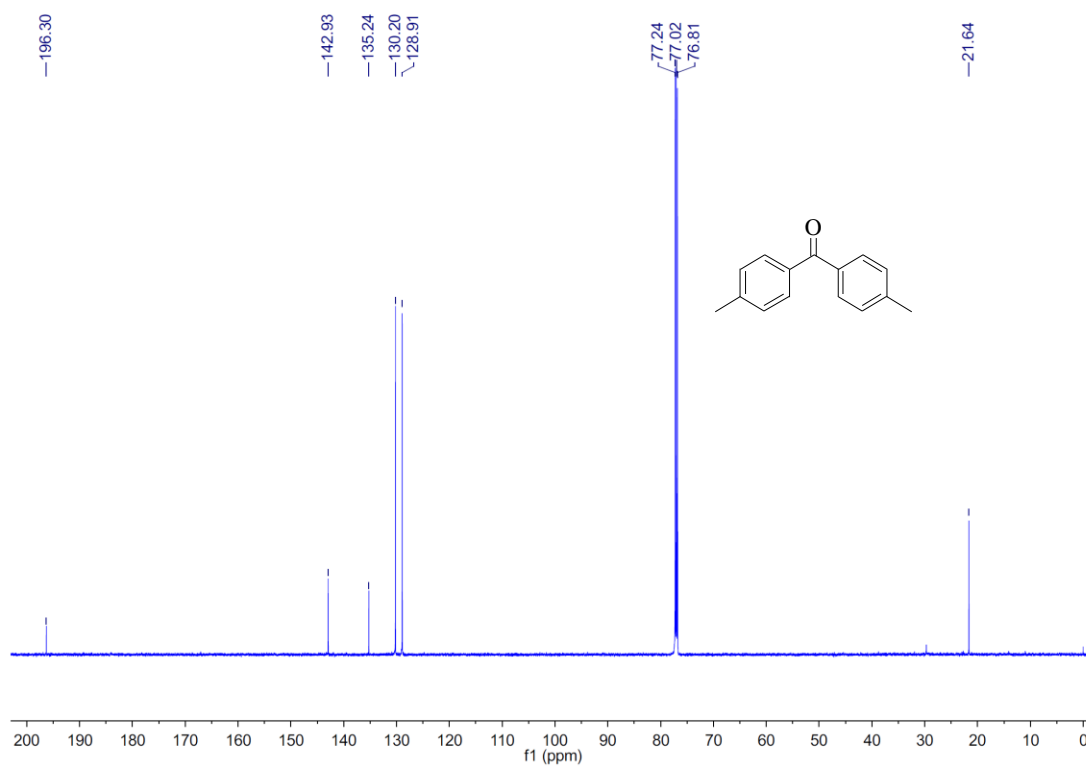

<sup>1</sup>H NMR of (4-ethylphenyl)(p-tolyl)methanone **3ac**

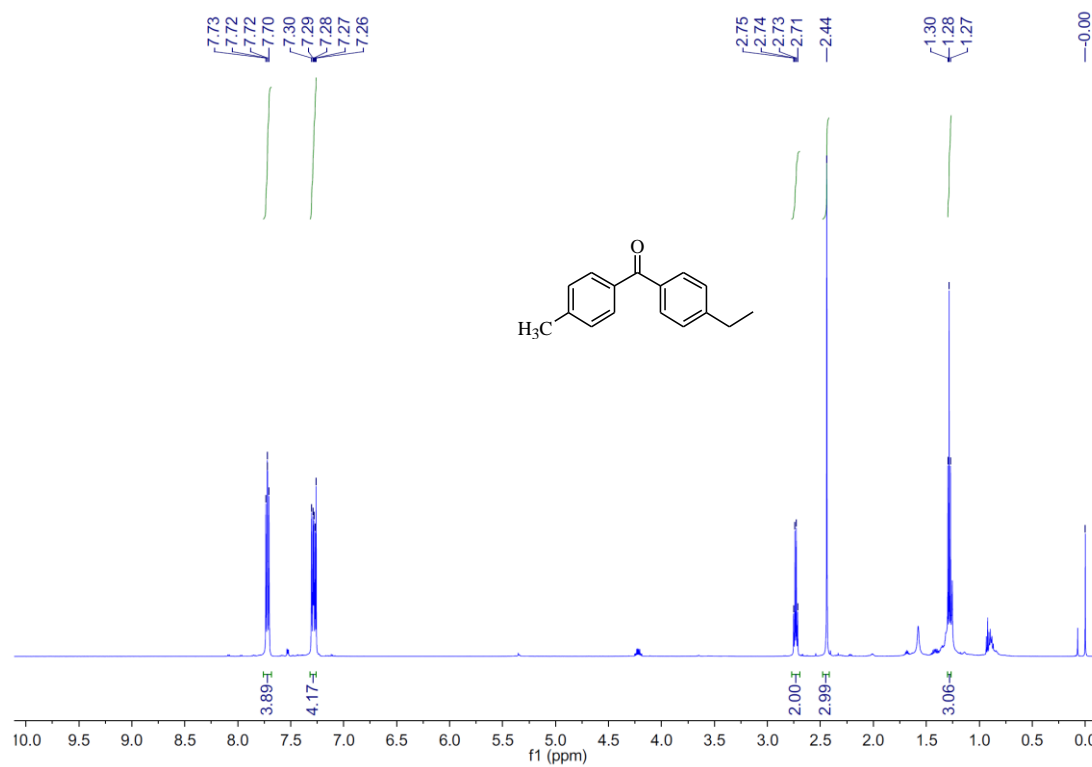

<sup>13</sup>C NMR of (4-ethylphenyl)(p-tolyl)methanone **3ac**

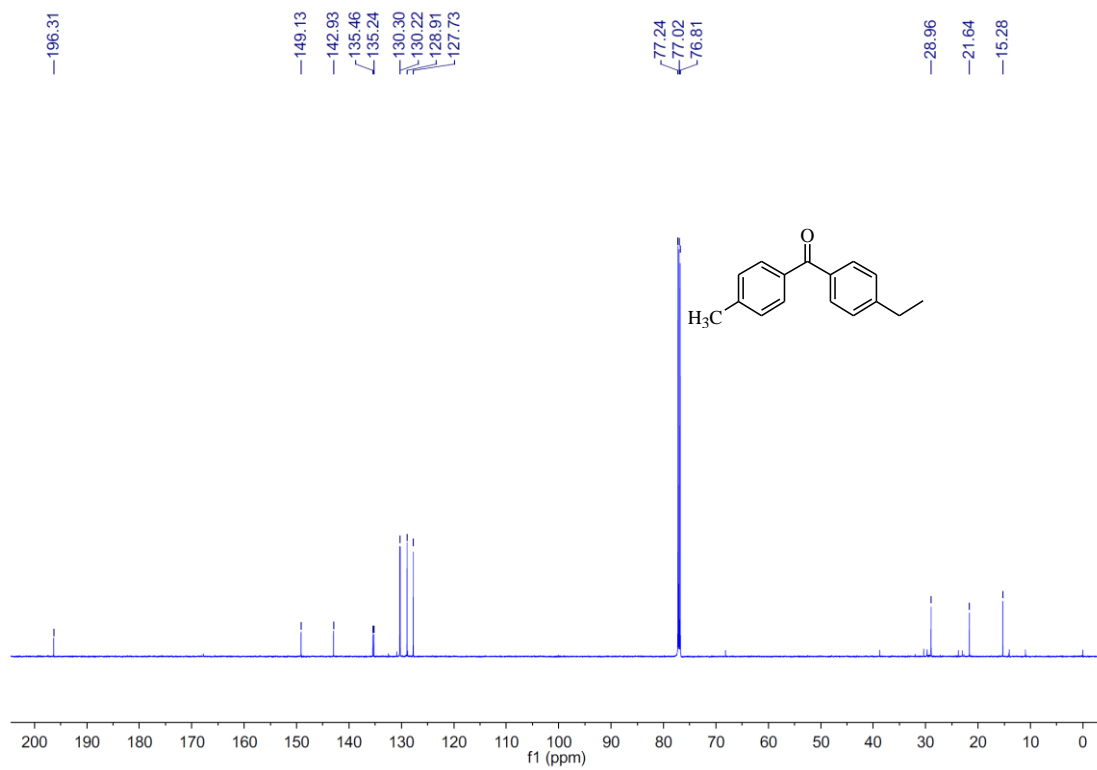

<sup>1</sup>H NMR of (4-butylphenyl)(p-tolyl)methanone **3ad**

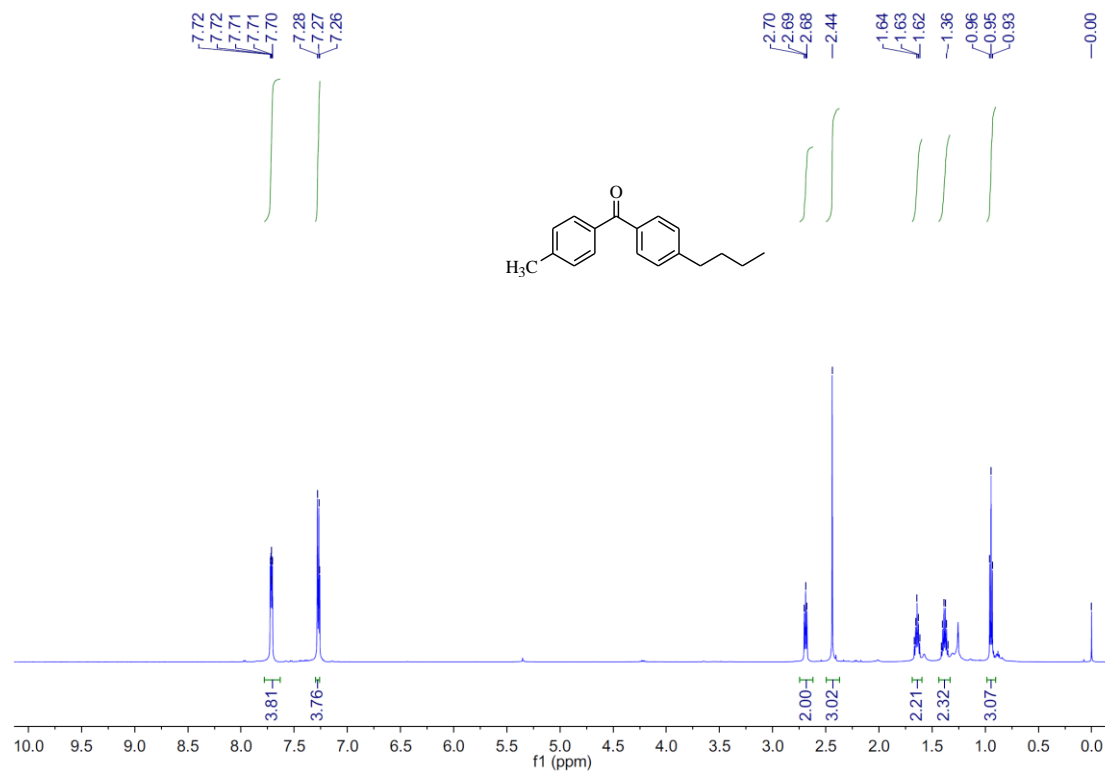

<sup>13</sup>C NMR of (4-butylphenyl)(p-tolyl)methanone **3ad**

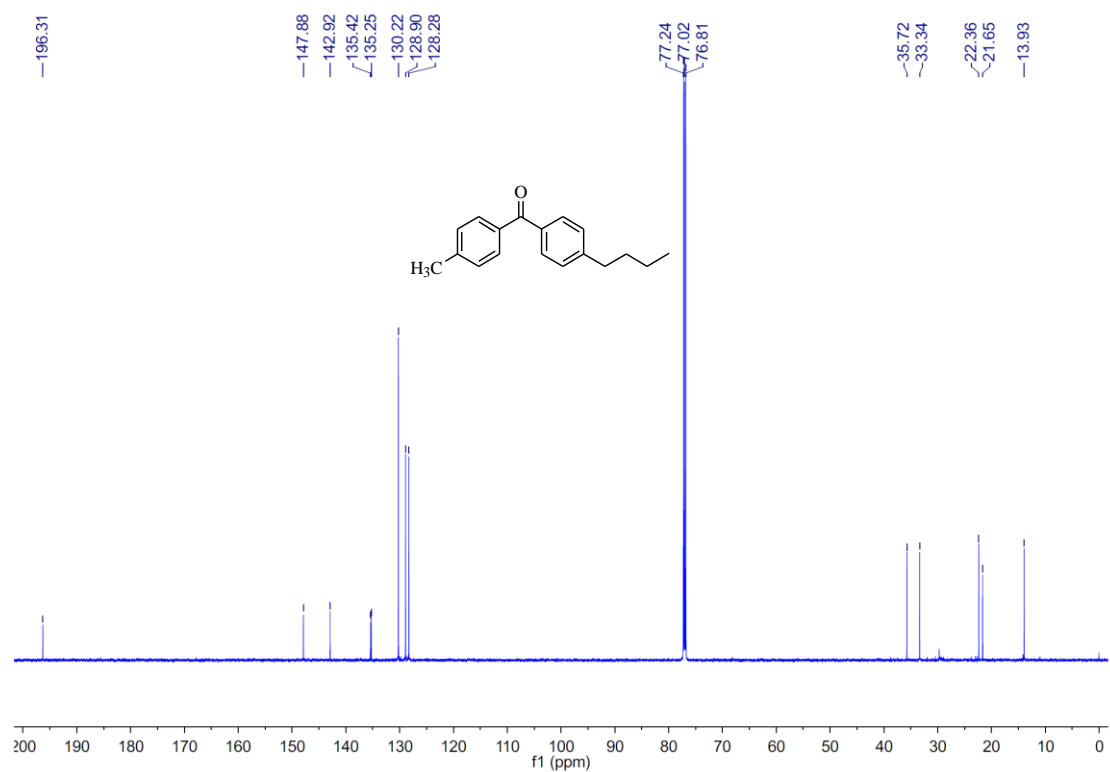

**<sup>1</sup>H NMR of (4-ethoxyphenyl)(p-tolyl)methanone **3ae****

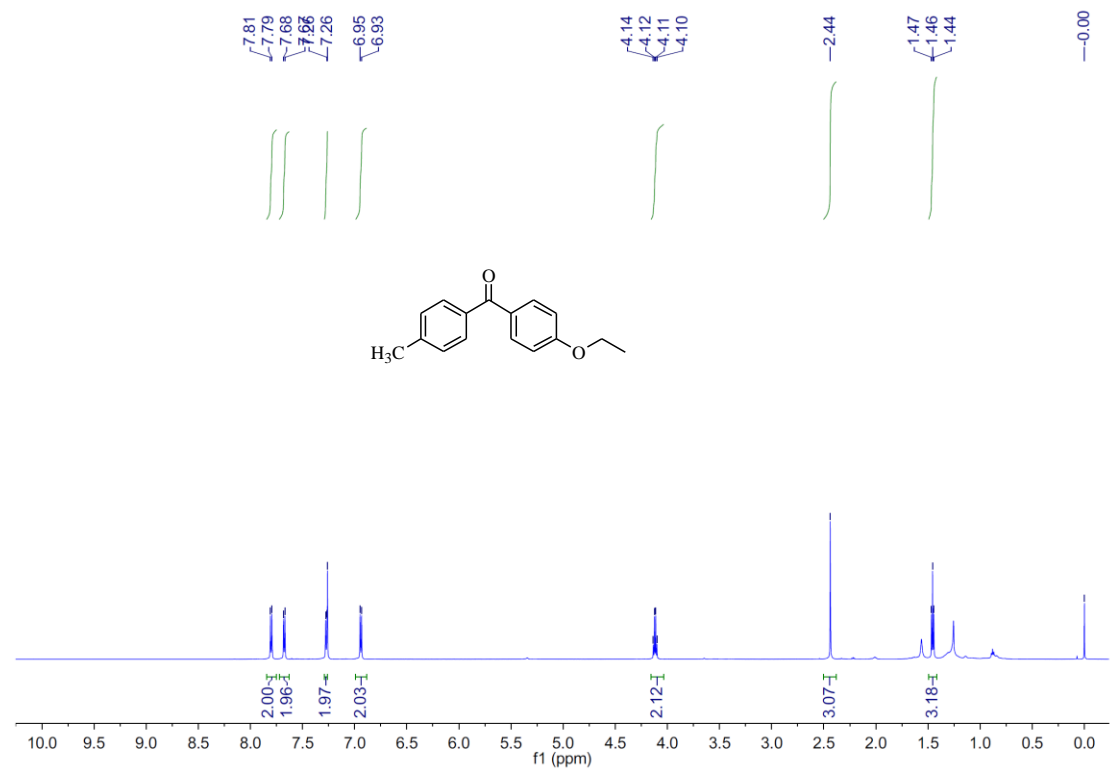

**<sup>13</sup>C NMR of (4-ethoxyphenyl)(p-tolyl)methanone **3ae****



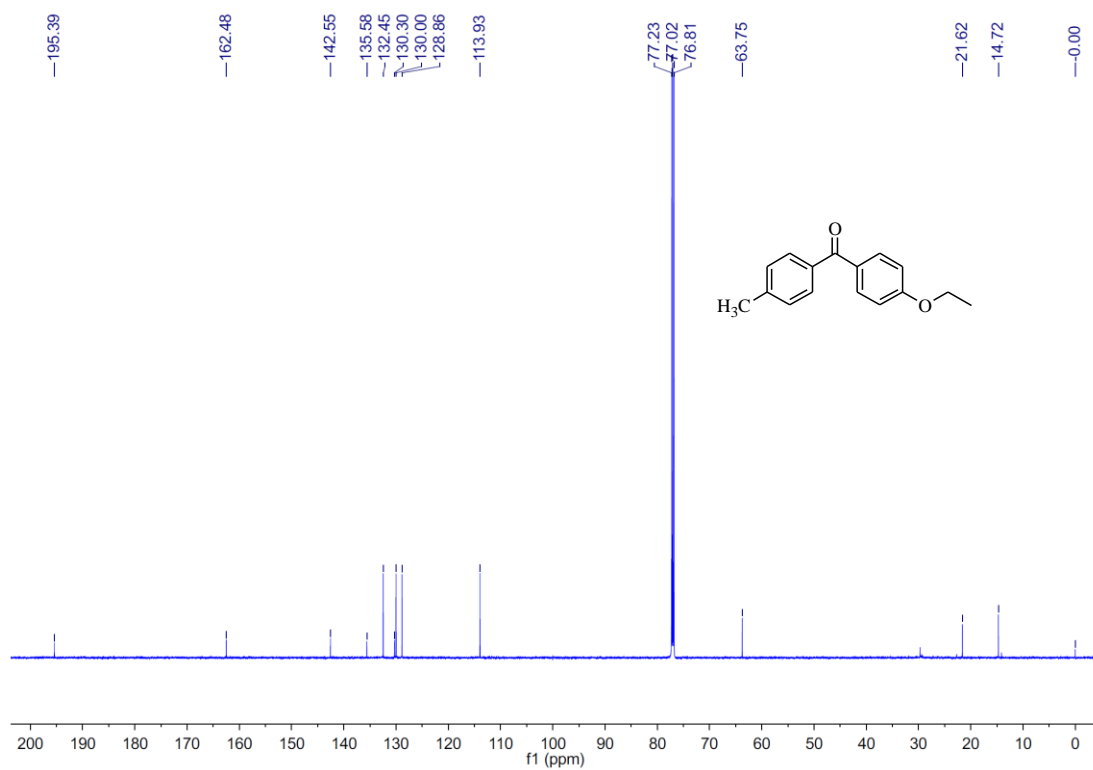

<sup>1</sup>H NMR of (3-ethoxyphenyl)(p-tolyl)methanone **3af**

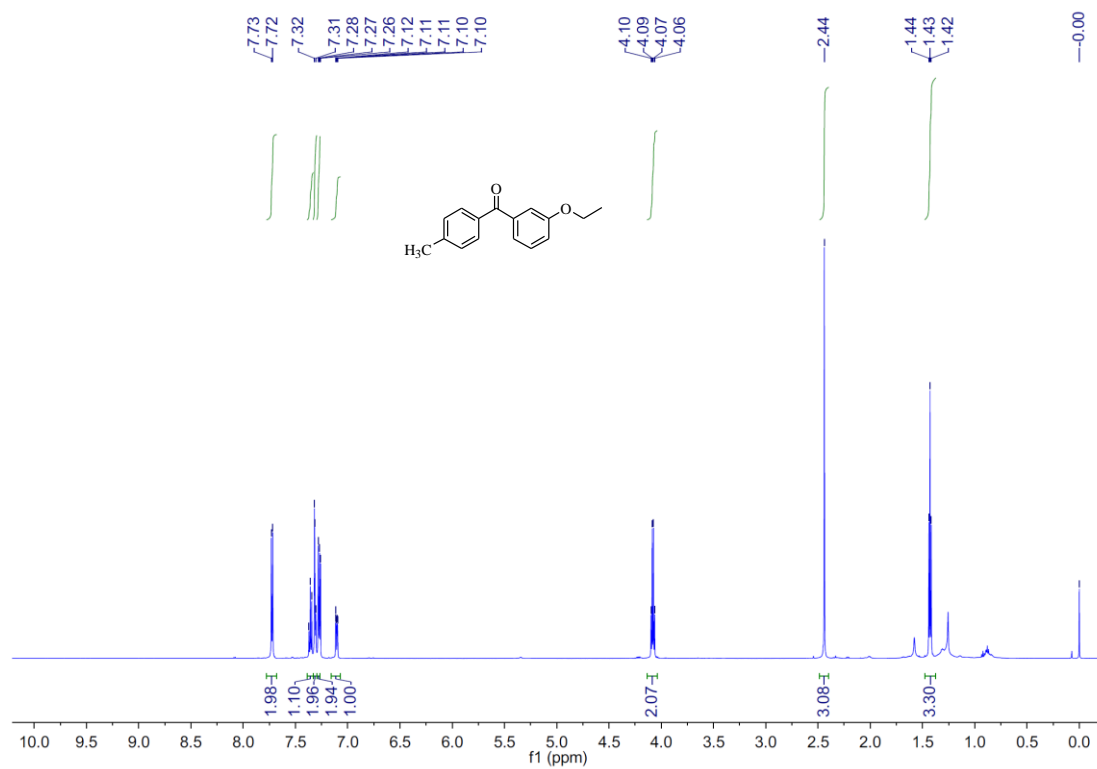

<sup>13</sup>C NMR of (3-ethoxyphenyl)(p-tolyl)methanone **3af**

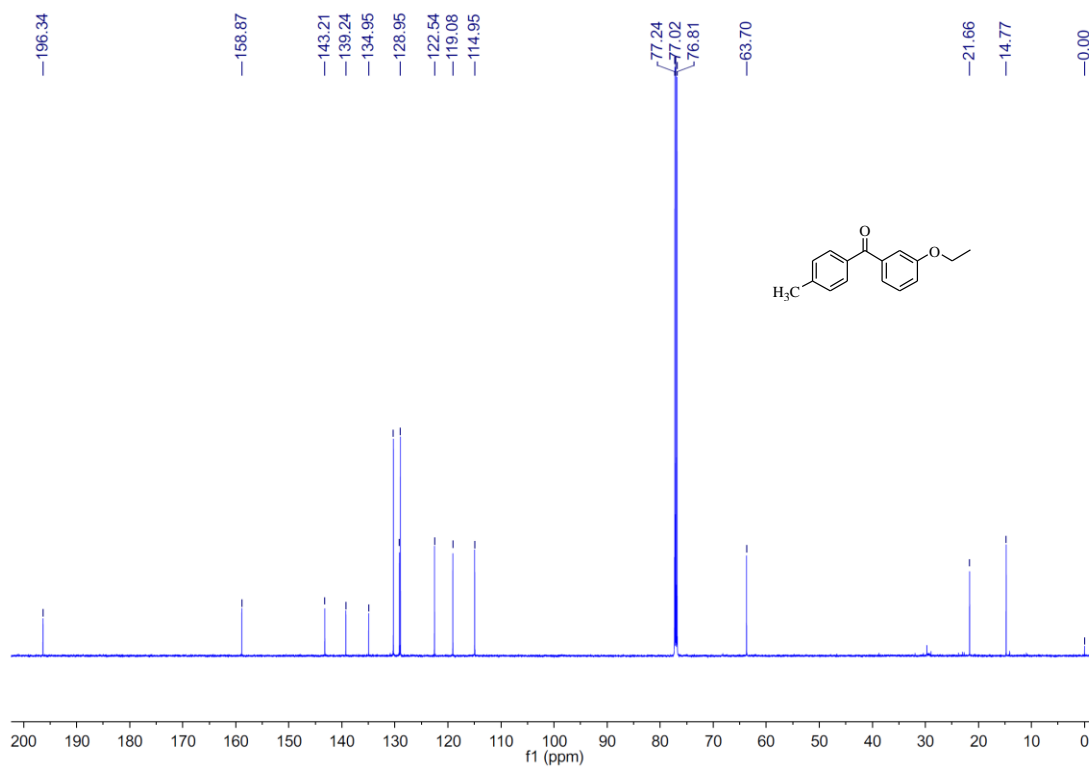

<sup>1</sup>H NMR of (4-bromophenyl)(p-tolyl)methanone **3ah**

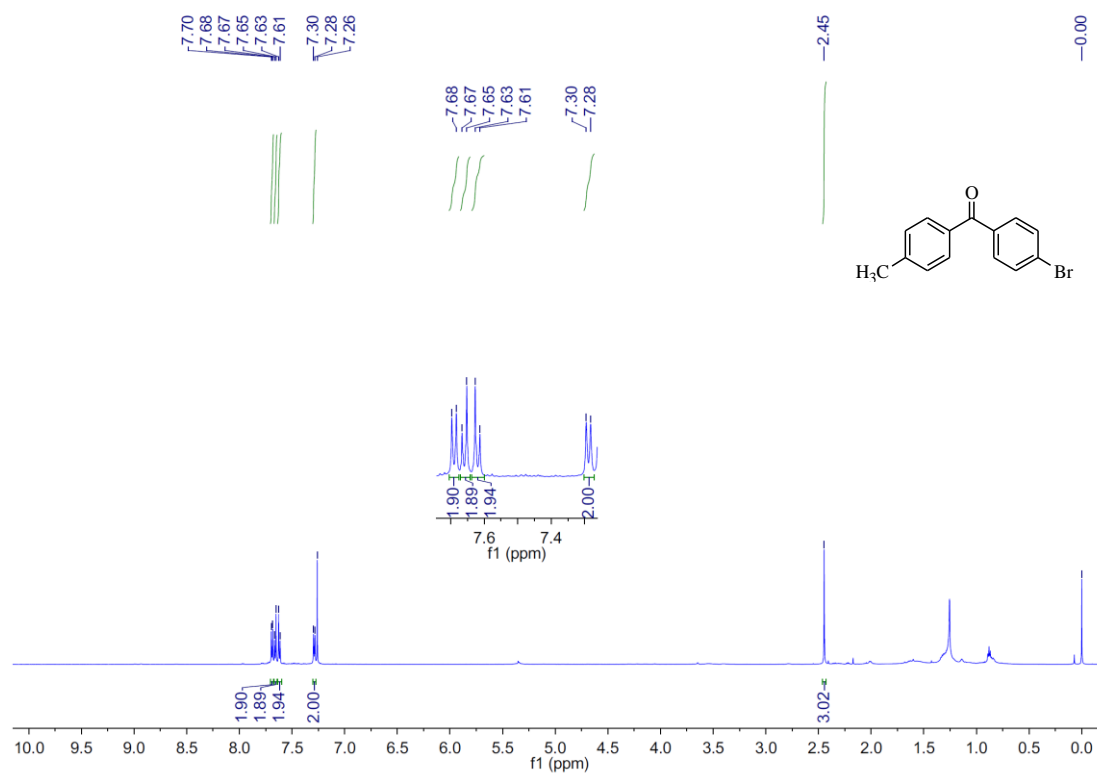

<sup>13</sup>C NMR of (4-bromophenyl)(p-tolyl)methanone **3ah**

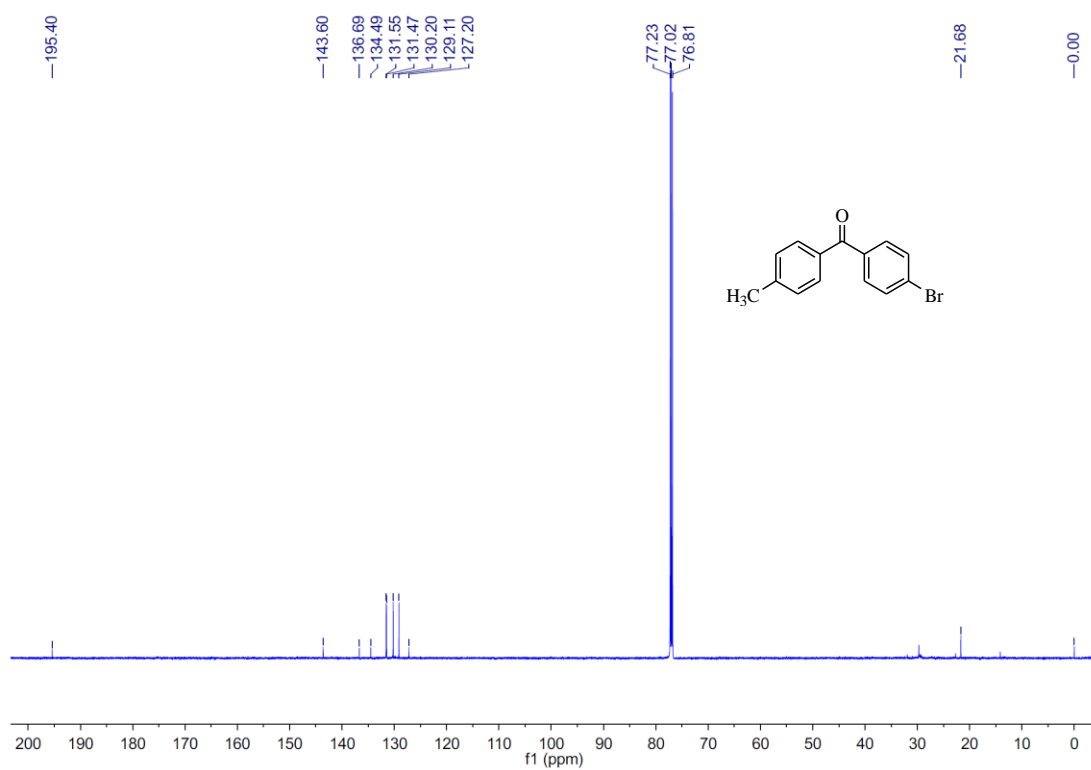

<sup>1</sup>H NMR of (4-fluorophenyl)(p-tolyl)methanone **3ai**

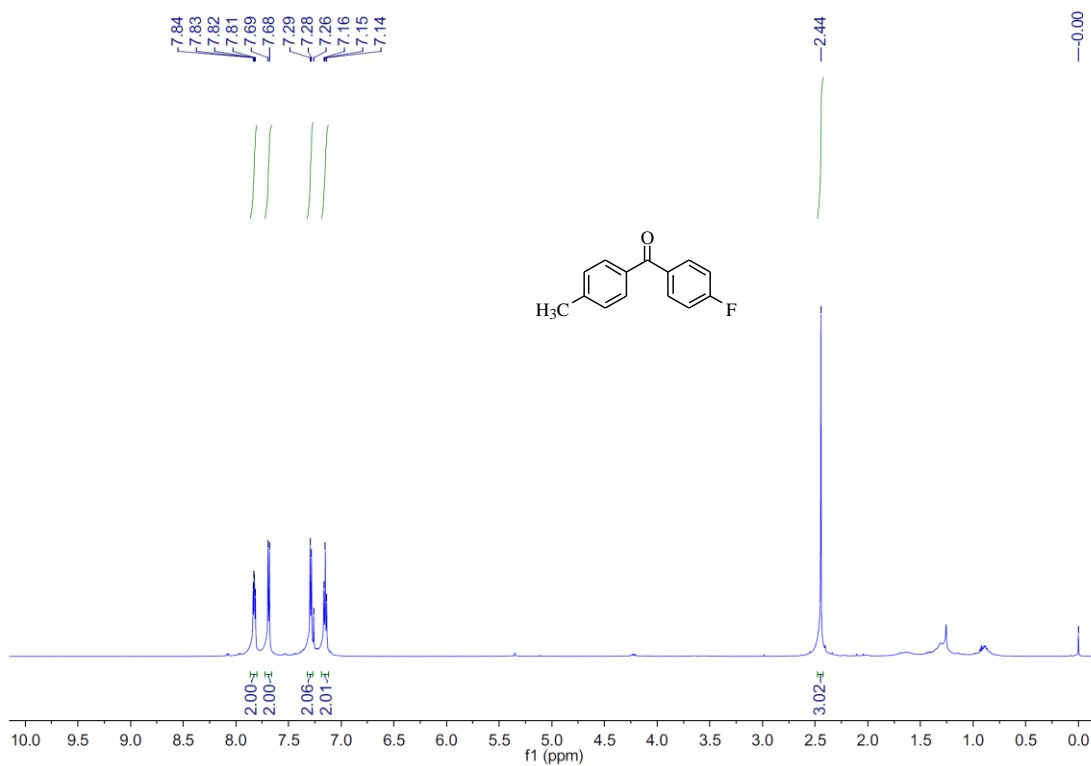

<sup>13</sup>C NMR of (4-fluorophenyl)(p-tolyl)methanone **3ai**

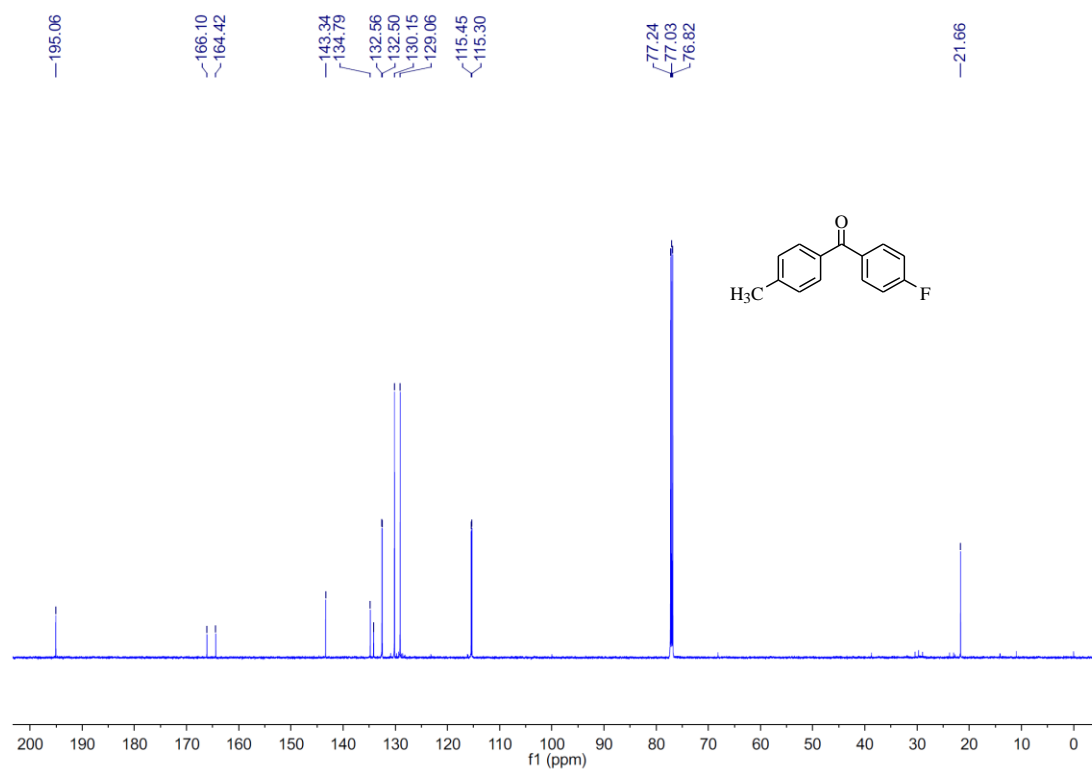

<sup>19</sup>F NMR of (4-fluorophenyl)(p-tolyl)methanone **3ai**

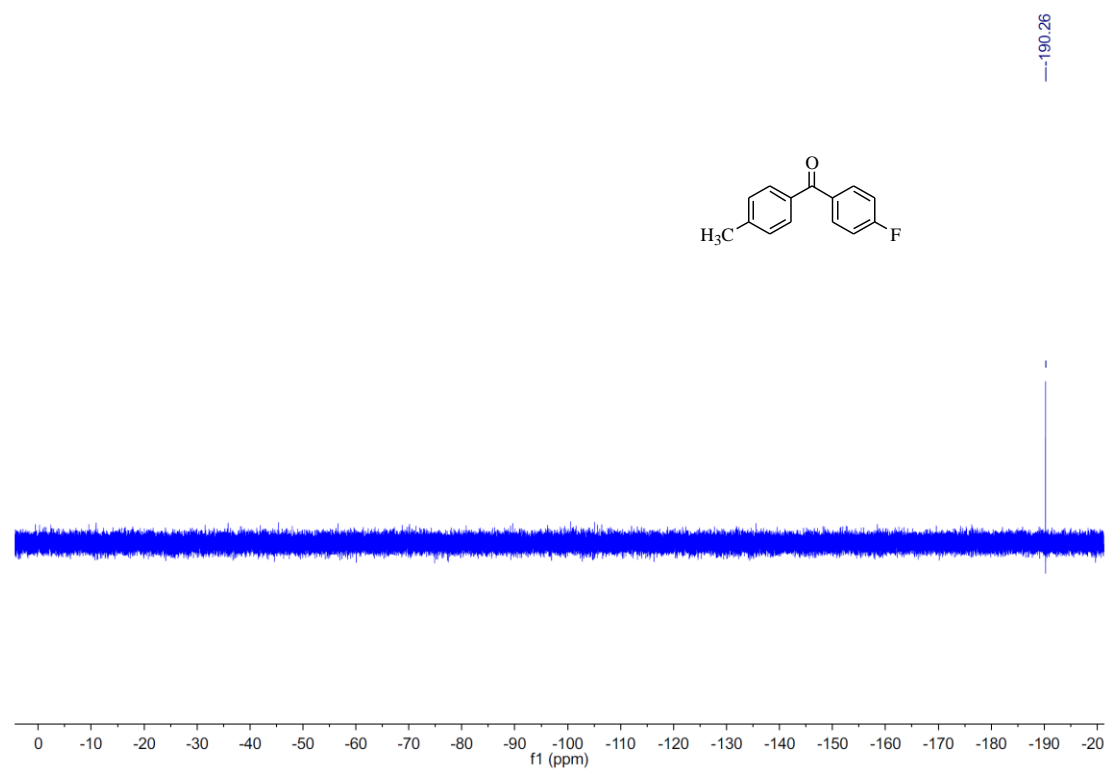

<sup>1</sup>H NMR of (3-fluorophenyl)(p-tolyl)methanone **3aj**

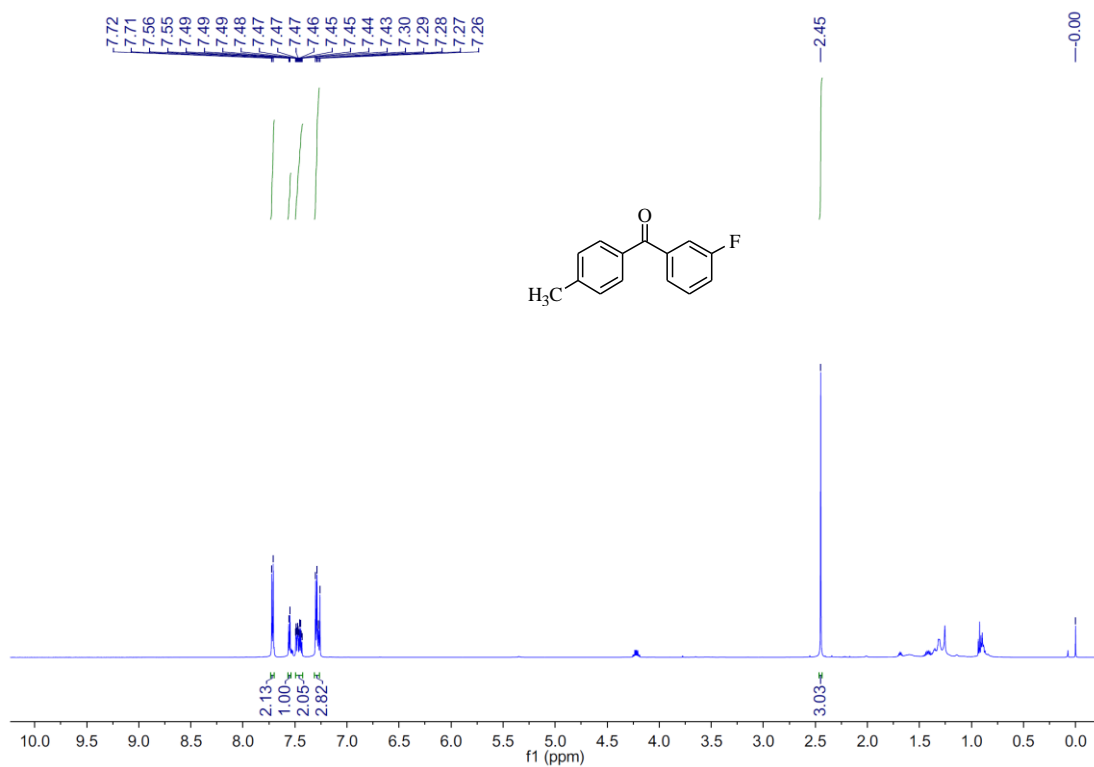

$^{19}\text{F}$  NMR of (3-fluorophenyl)(p-tolyl)methanone **3aj**

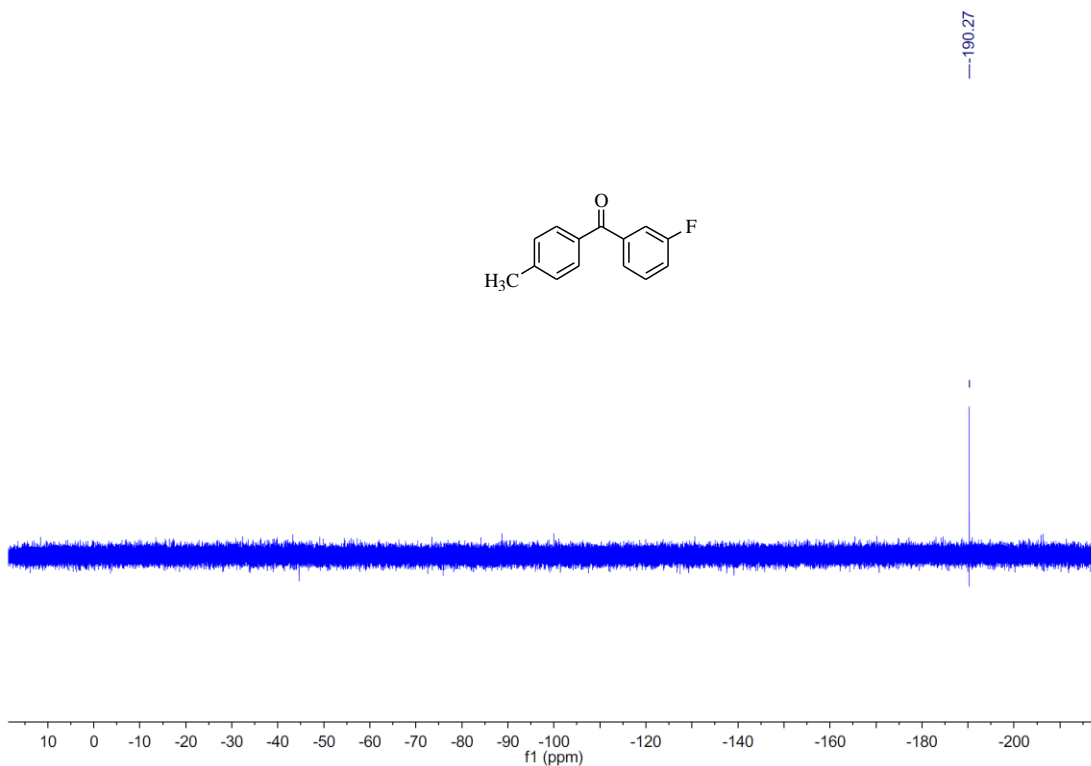

$^1\text{H}$  NMR of p-tolyl(4-(trifluoromethyl)phenyl)methanone **3ak**

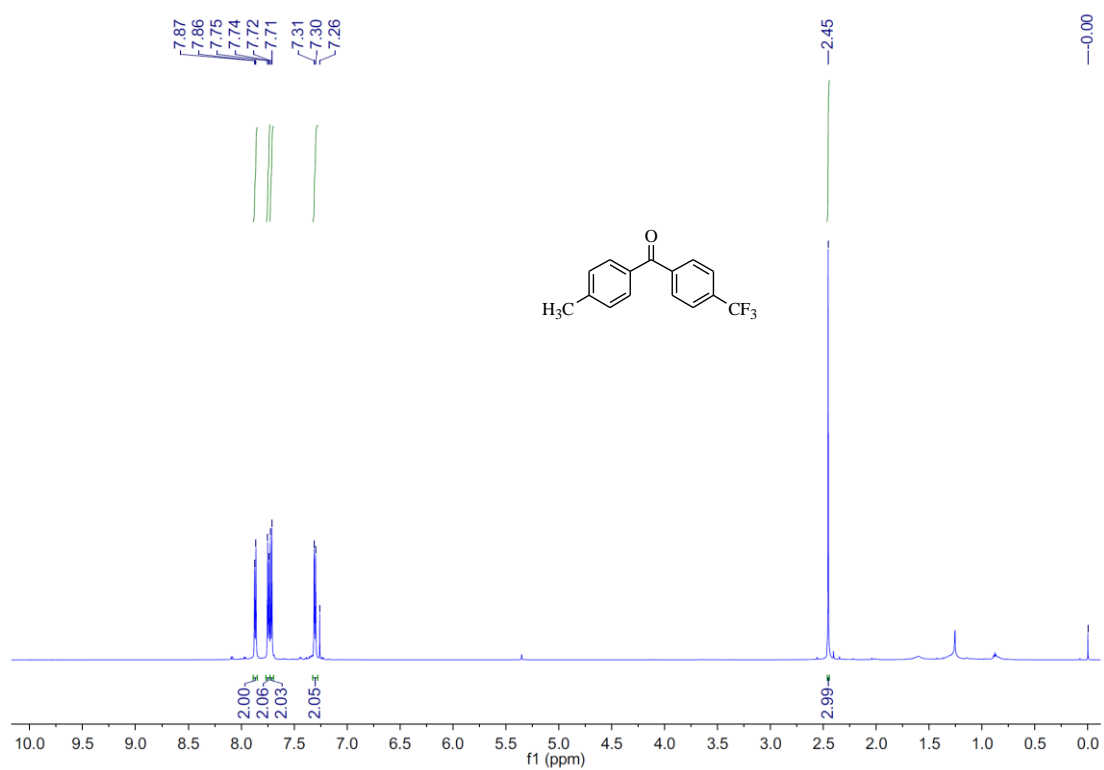

**<sup>13</sup>C NMR of p-tolyl(4-(trifluoromethyl)phenyl)methanone **3ak****

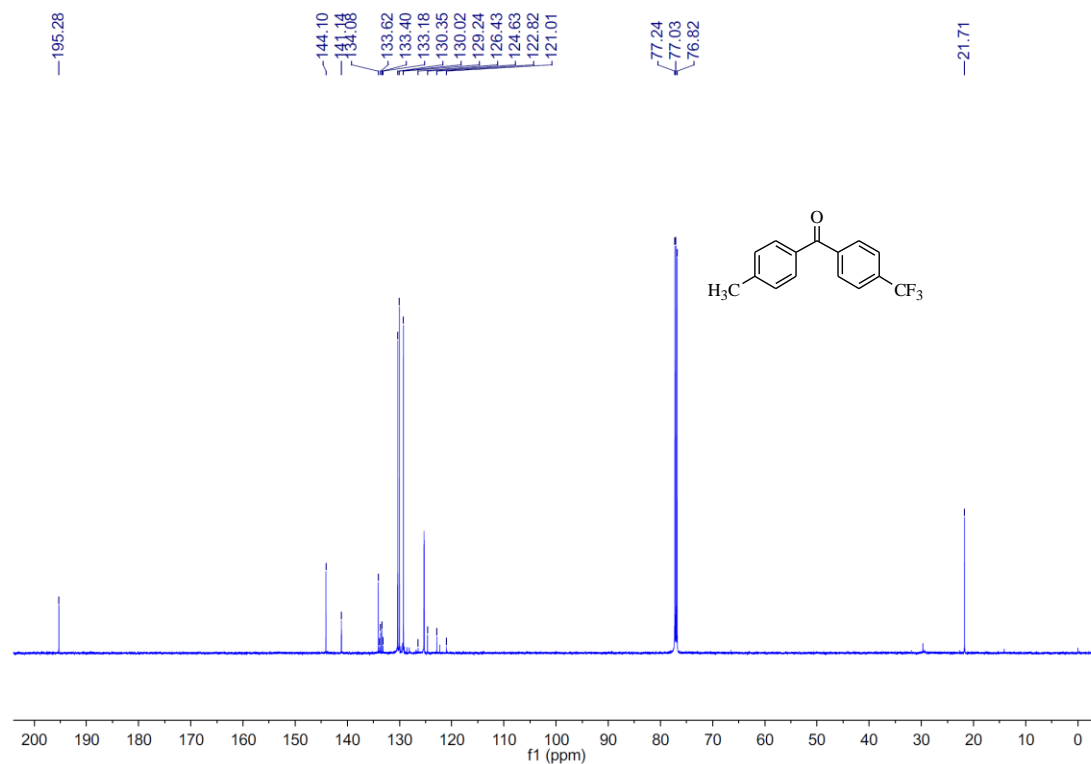

**<sup>19</sup>F NMR of p-tolyl(4-(trifluoromethyl)phenyl)methanone **3ak****

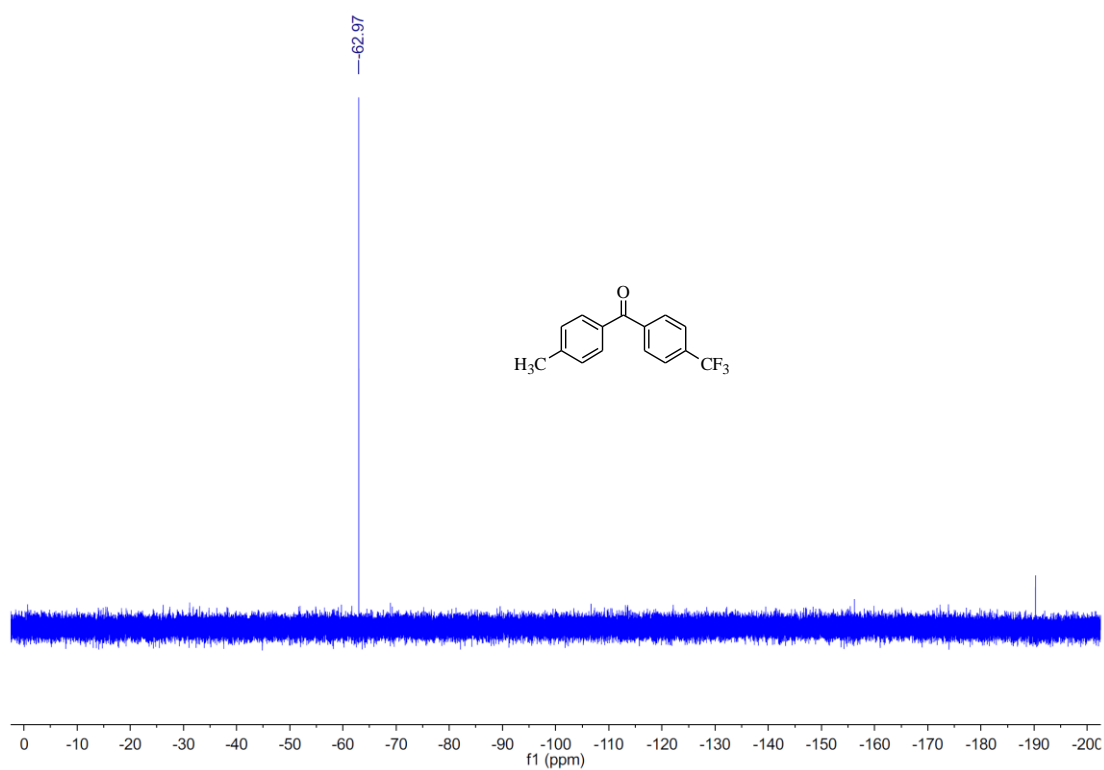

$^1\text{H}$  NMR of (4-(methylthio)phenyl)(p-tolyl)methanone **3al**

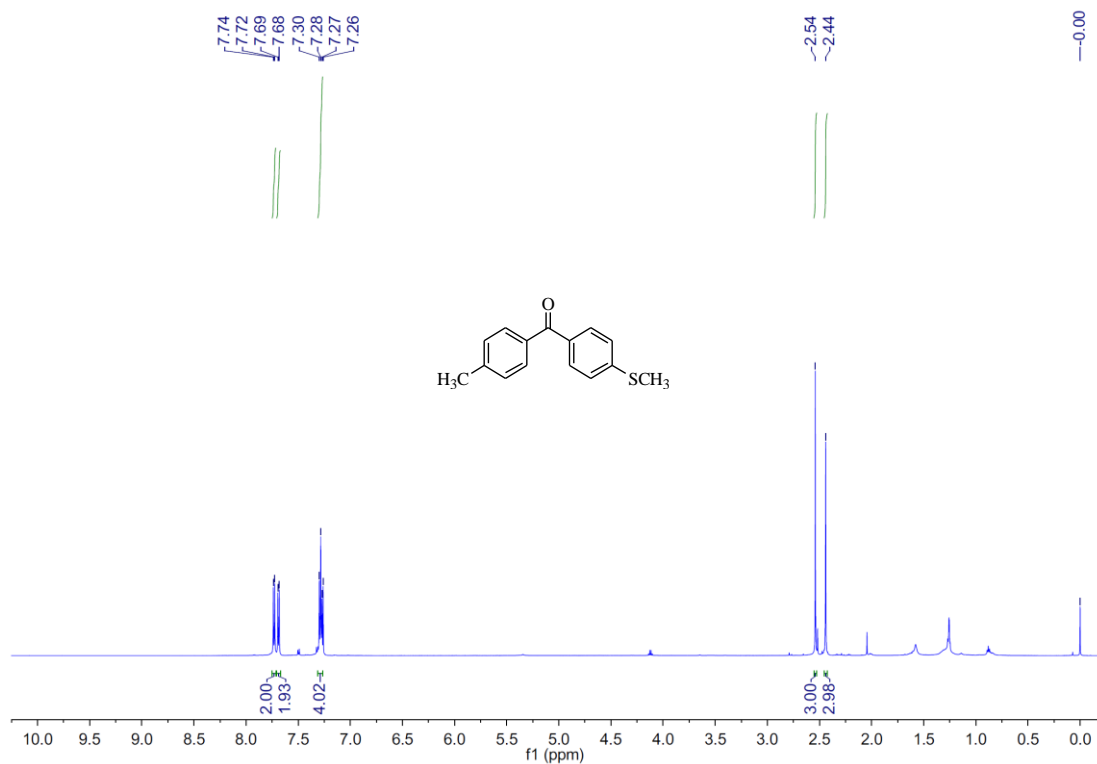

$^{13}\text{C}$  NMR of (4-(methylthio)phenyl)(p-tolyl)methanone **3al**

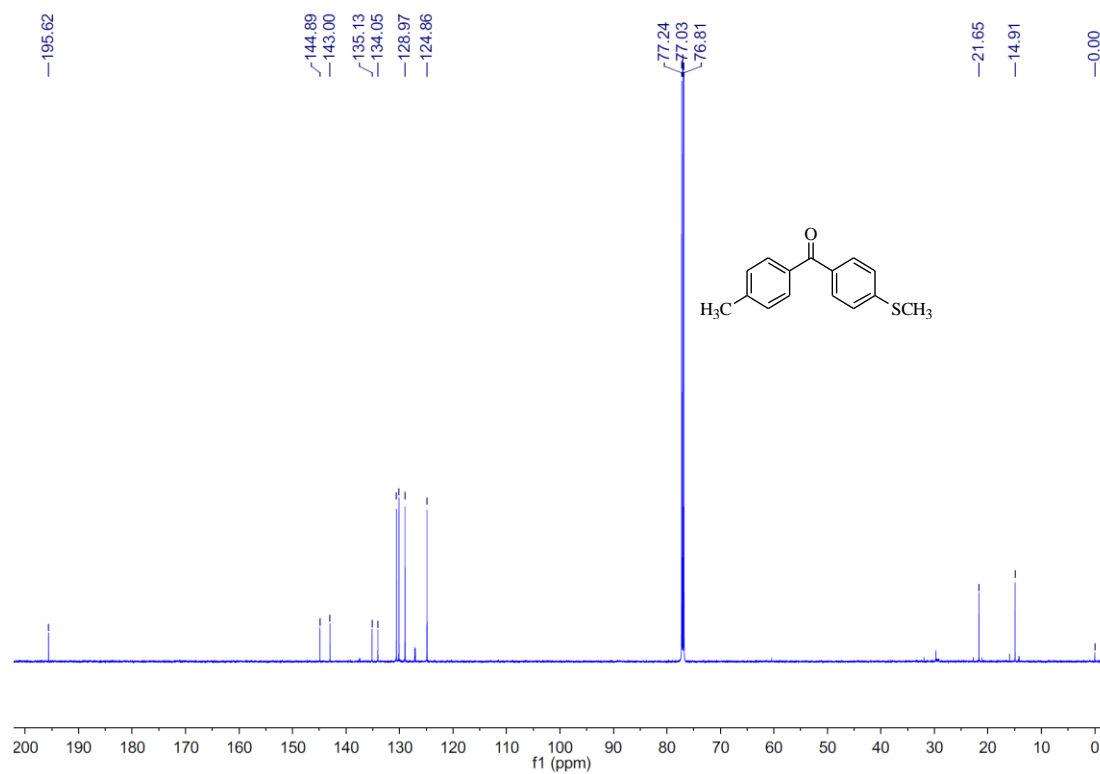

<sup>1</sup>H NMR of (4-phenoxyphenyl)(p-tolyl)methanone **3am**

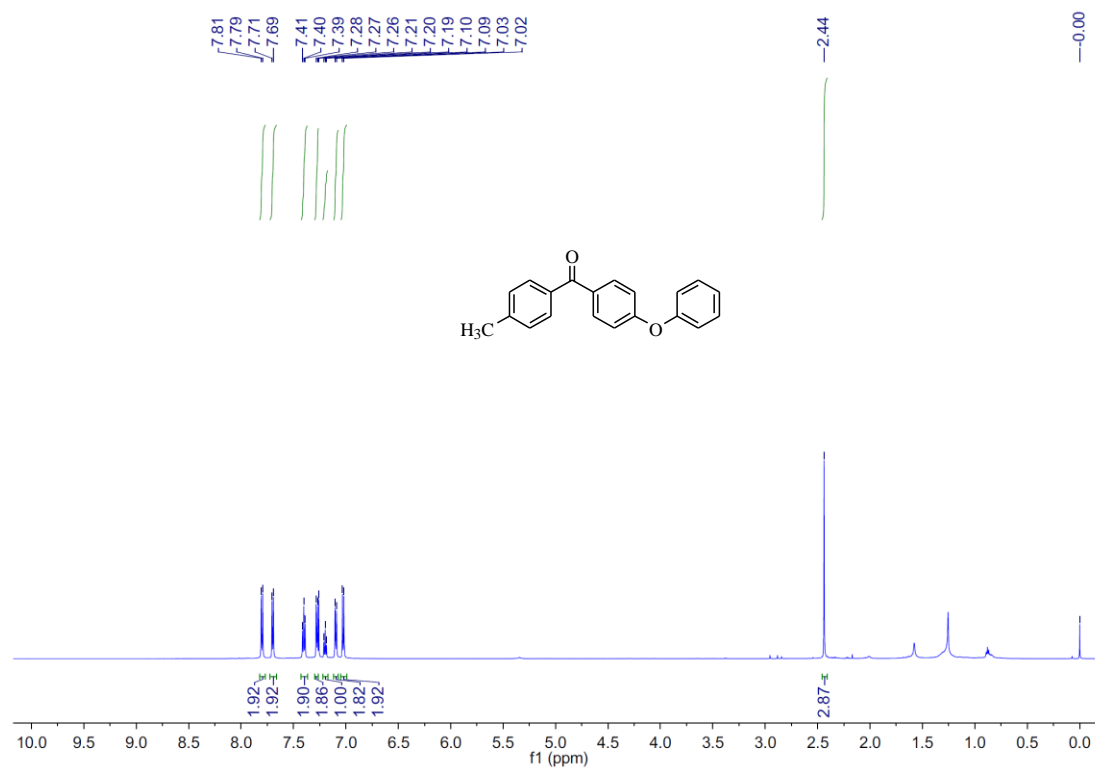

<sup>13</sup>C NMR of (4-phenoxyphenyl)(p-tolyl)methanone **3am**



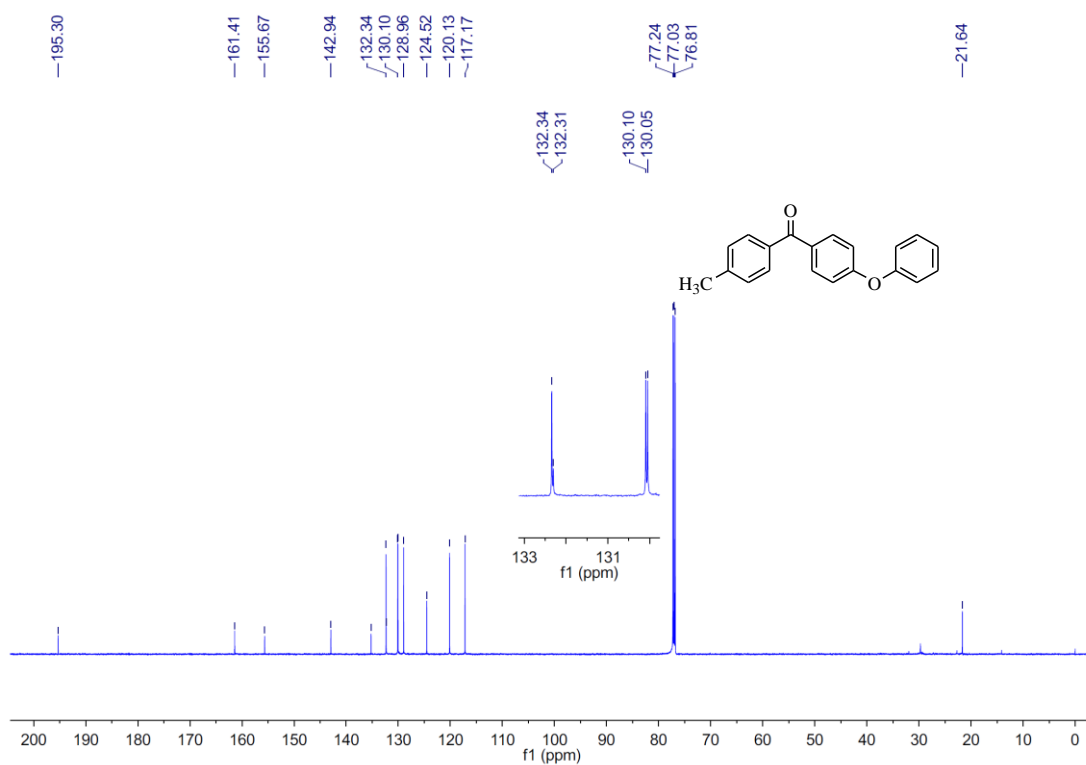

<sup>1</sup>H NMR of benzo[d][1,3]dioxol-5-yl(p-tolyl)methanone **3an**

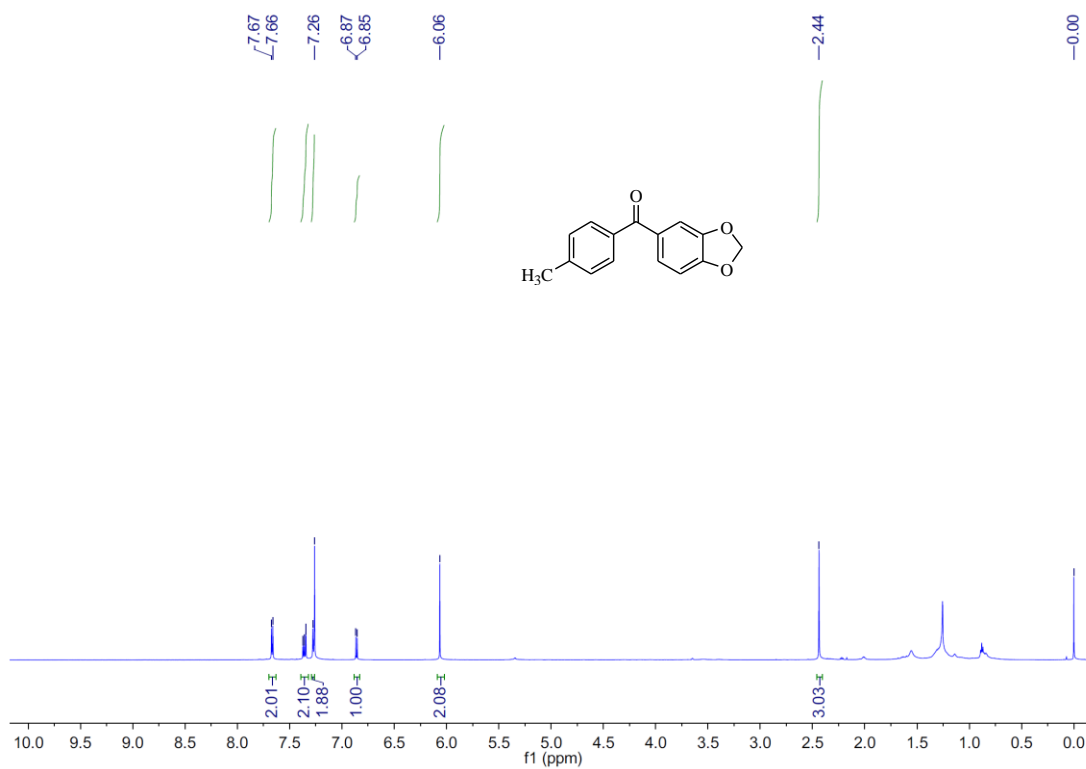

<sup>13</sup>C NMR of benzo[d][1,3]dioxol-5-yl(p-tolyl)methanone **3an**

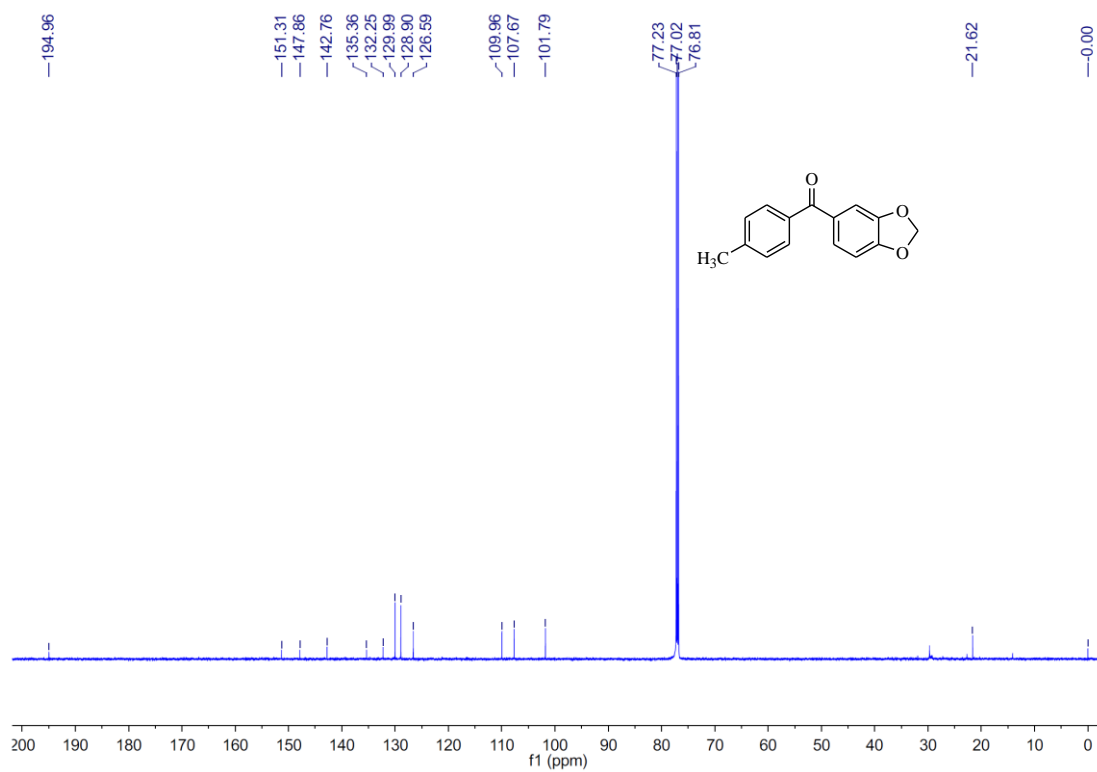

<sup>1</sup>H NMR of 4-methylbenzoic acid phenyl ester **5aa**

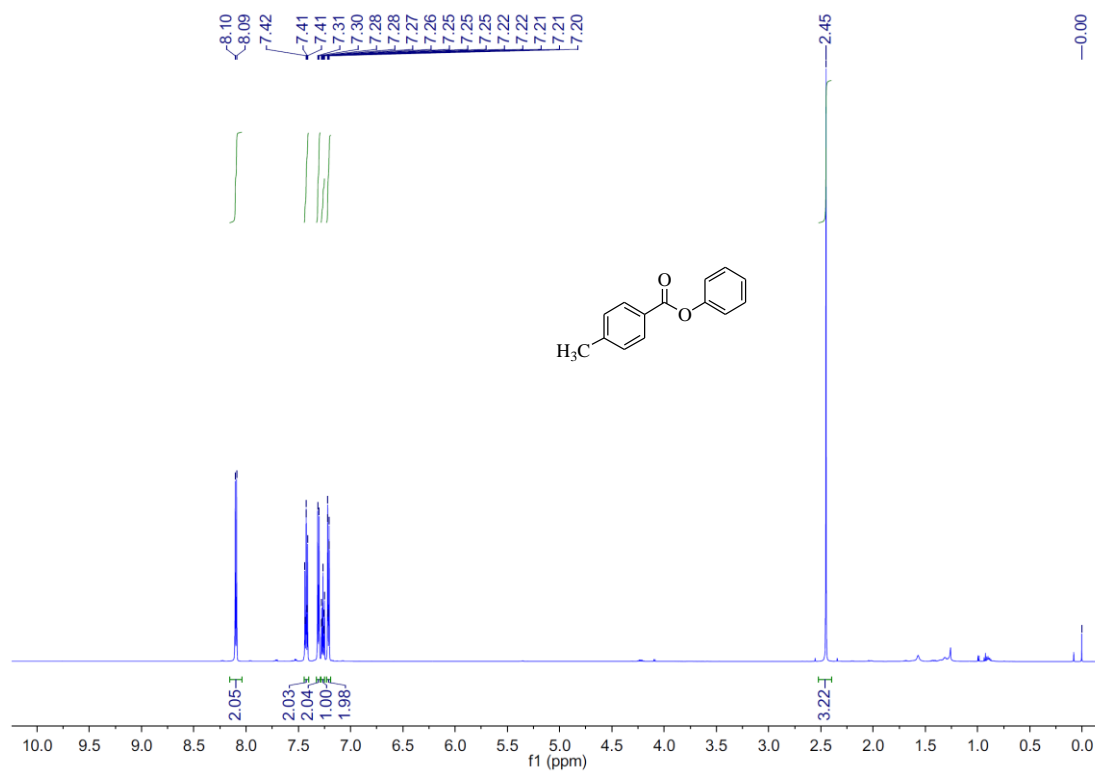

<sup>1</sup>H NMR of benzoic acid phenyl ester **5ga**

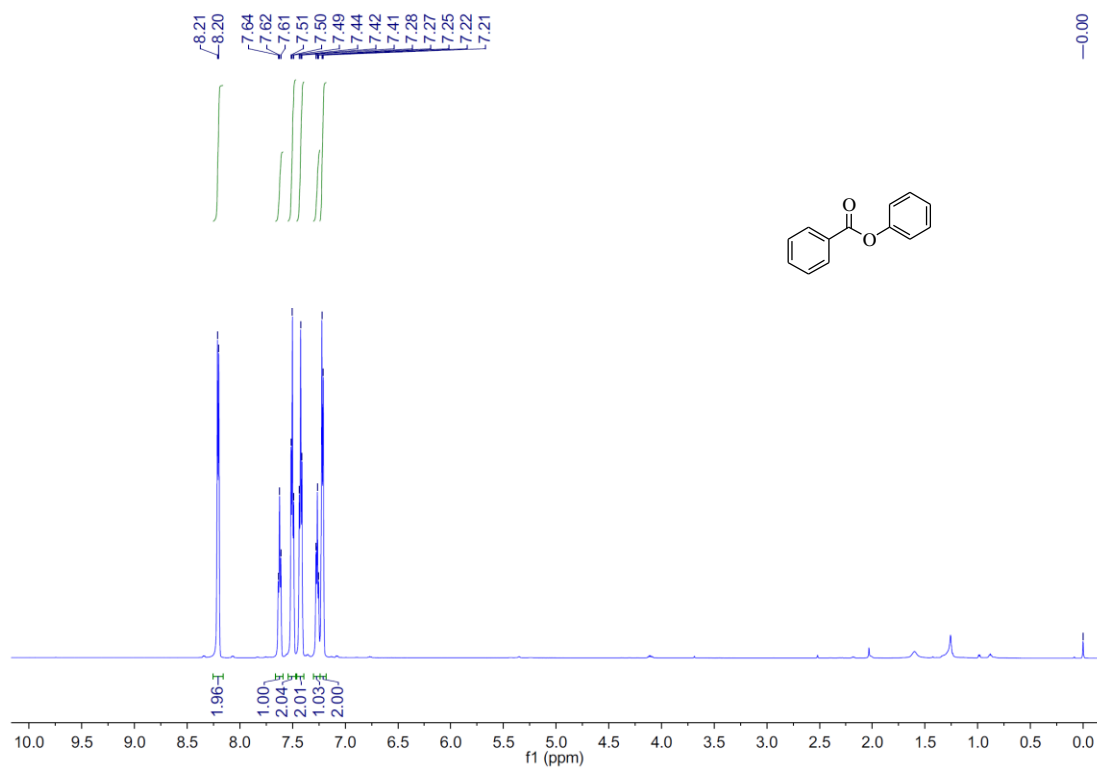

Supplement: c9ra02394a1.pdf [file c9ra02394a1.pdf]
